## Pathomechanisms of Type 2 Diabetes Genes

Harald Staiger, Fausto Machicao, Andreas Fritsche, and Hans-Ulrich Häring

Department of Internal Medicine, Division of Endocrinology, Diabetology, Angiology, Nephrology, and Clinical Chemistry, University Hospital Tübingen, D-72076 Tübingen, Germany

Type 2 diabetes mellitus is a complex metabolic disease that is caused by insulin resistance and  $\beta$ -cell dysfunction. Furthermore, type 2 diabetes has an evident genetic component and represents a polygenic disease. During the last decade, considerable progress was made in the identification of type 2 diabetes risk genes. This was crucially influenced by the development of affordable high-density single nucleotide polymorphism (SNP) arrays that prompted several successful genome-wide association scans in large case-control cohorts. Subsequent to the identification of type 2 diabetes risk SNPs, cohorts thoroughly phenotyped for prediabetic traits with elaborate *in vivo* methods allowed an initial characterization of the pathomechanisms of these SNPs. Although the underlying molecular mechanisms are still incompletely understood, a surprising result of these pathomechanistic investigations was that most of the risk SNPs affect  $\beta$ -cell function. This favors a  $\beta$ -cell-centric view on the genetics of type 2 diabetes. The aim of this review is to summarize the current knowledge about the type 2 diabetes risk genes and their variants' pathomechanisms. (*Endocrine Reviews* 30: 557–585, 2009)

- I. Introduction
- II. Genetics of Type 2 Diabetes
- III. Gene Variants Affecting Insulin Secretion
  - A. SNP effects on glucose-stimulated insulin secretion
  - B. SNP effects on incretin sensitivity or incretin secretion
  - C. SNP effects on proinsulin conversion
- IV. Gene Variants Affecting Insulin Sensitivity
  - A. SNP effects on peripheral insulin sensitivity
  - B. SNP effects on insulin clearance
  - C. SNP effects on cerebrocortical insulin sensitivity
- V. Gene Variants Affecting Glucagon Secretion
- VI. Gene Variants Affecting Adiposity
- VII. Summary and Perspective

### I. Introduction

Type 2 diabetes mellitus is characterized by chronic hyperglycemia due to insulin resistance of peripheral tissues (skeletal muscle, liver, adipose tissue) and probably also the brain and insufficient compensatory insulin secretion by pancreatic  $\beta$ -cells (1, 2). In contrast to insulin resistance, the decline in  $\beta$ -cell function is considered a late event (3) and was shown to be, at least in part, caused by an irreversible loss of  $\beta$ -cell mass (4). It is commonly ac-

cepted that type 2 diabetes results, on the one hand, from population aging and, on the other hand, from adverse environmental factors of the modern world (*i.e.*, high-caloric diets, physical inactivity, and a sedentary lifestyle) which favor the development of obesity. In fact, excess body weight represents a major risk factor for type 2 diabetes (5–7). However, some 10% of type 2 diabetic patients display normal weight, and many obese subjects never develop type 2 diabetes, indicating that type 2 diabetes is not exclusively caused by environmental factors.

Because recent genome-wide association (GWA) studies revealed convincing evidence for the contribution of genes to the pathogenesis of type 2 diabetes (8) and subsequent efforts in thoroughly and uniquely phenotyped cohorts provided first insights into these genes' pathomechanistic roles (9), it is the purpose of this review to summarize the currently available information about (confirmed and potential) type 2 diabetes risk genes and to describe the current understanding of their pathomechanisms.

### II. Genetics of Type 2 Diabetes

Type 2 diabetes clearly represents a multifactorial disease, and several findings indicate that genetics is an important

ISSN Print 0021-972X ISSN Online 1945-7197  
Printed in U.S.A.

Copyright © 2009 by The Endocrine Society  
doi: 10.1210/er.2009-0017 Received April 27, 2009. Accepted July 24, 2009.  
First Published Online September 11, 2009.

Abbreviations: BMI, Body mass index; GIP, gastric inhibitory polypeptide; GLP-1, glucagon-like peptide 1; GWA, genome-wide association; MODY, maturity onset diabetes of the young; OGTT, oral glucose tolerance test; PC-1, plasma cell glycoprotein 1; PPAR, peroxisome proliferator-activated receptor; SNP, single nucleotide polymorphism.

contributing factor. First, certain ethnic minorities and indigenous groups with low population admixture (e.g., Pima Indians, Micronesians and other Pacific Islanders, Australian Aborigines, and Mexican-Americans) show exceptionally high type 2 diabetes prevalence (up to 21% in Pima Indians) (10–12). Second, type 2 diabetes clusters within families and first-degree relatives have, compared with the general population, an up to 3.5-fold higher risk to develop the disease (13, 14). Finally, twin studies demonstrated a markedly higher concordance for type 2 diabetes in monozygotic compared with dizygotic twins (~70 vs. 10%) (15). Type 2 diabetes does not follow simple Mendelian inheritance and, therefore, is considered a polygenic disease. According to the generally accepted common variant-common disease hypothesis (16), complex diseases, such as type 2 diabetes, are caused by the simultaneous occurrence of common DNA sequence variations (minor allele frequencies >5%) in many genes. Each of these DNA alterations is supposed to exert only moderate effects on the affected genes' function and/or expression, but in their sum, these variations confer an increased susceptibility toward the adverse environmental factors mentioned above. Single nucleotide polymorphisms (SNPs), exchanges of single base pairs, cover approximately 90% of the sequence variation within the human genome (SNP Fact Sheet of the Human Genome Project; available at [http://www.ornl.gov/sci/techresources/Human\\_Genome/faq/snps.shtml](http://www.ornl.gov/sci/techresources/Human_Genome/faq/snps.shtml)) and are therefore regarded as the major determinants of the individual predisposition to complex diseases. Thus, strong efforts are currently ongoing to map and catalog these sequence variations (The International HapMap Project at <http://www.hapmap.org/index.html>). However, the less frequent copy number variations (due to deletion and/or duplication of DNA segments one kilobase to several megabases in size) and smaller DNA insertions, deletions, duplications, and inversions may also play a role. All of these findings initiated an intensive search for the genes, or better gene variants, responsible for the genetic predisposition to type 2 diabetes.

Two main approaches dominate the search for type 2 diabetes genes: the candidate gene approach and the hypothesis-free GWA scan (13). Candidate genes usually arise from diverse research directions (see below). They are combed through for common genetic variants, and these variants' allele frequencies are finally analyzed for being altered in type 2 diabetes cases compared with healthy controls. Areas generating candidate genes include:

- Basic research: a plethora of cell and mouse studies on insulin action, insulin secretion, obesity, mitochondrial dysfunction, etc., provided several *bona fide* biological candidates. Among these, *PPARG* on chromosome

3p25 (17–35) and *KCNJ11* on chromosome 11p15.1 (23, 28–30, 33, 34, 36–46) currently represent the best replicated diabetes risk genes confirmed by recent GWA studies. Another well-replicated biological candidate gene that was not yet confirmed by GWA studies or large meta-analyses and, therefore, has still to be classified as a potential diabetes risk gene is *ADIPOQ* on chromosome 3q27 (25, 47–61). Other recently identified SNPs in the biological candidates *SREBF1* on chromosome 17p11.2 (62–65), *PPARGC1A* on chromosome 4p15.1 (66–73), *AHSG* on chromosome 3q27.3 (74, 75), *FOXO1* on chromosome 13q14.1 (76, 77), and *SGK1* on chromosome 6q23 (78, 79) also appear to represent very promising potential type 2 diabetes risk variants that await further replication in other populations and across different ethnicities and confirmation by large meta-analyses or GWA studies.

- Rodent genetics: positional cloning of genes identified by cross-breeding experiments between diabetes-prone and diabetes-resistant mouse and rat strains and translational assessment of their role in humans represent this approach's rationale. Recently, with *Sorcs1* (human homolog on chromosome 10q23-q25) (80, 81), *Tbc1d1* (human homolog on chromosome 4p14) (82), and *Ll* (human homolog on chromosome 1q24.1) (83), first candidate genes were reported, but their importance for human type 2 diabetes still has to be established.
- Genetics of rare monogenic forms of human diabetes: common variants located in or near genes, in which rare mutations are known to exert strong effects and cause monogenic forms of diabetes [maturity onset diabetes of the young (MODY), Wolfram syndrome, etc.], represent plausible risk variants for the more common form of type 2 diabetes. Such common variants with confirmed evidence for robust association with typical type 2 diabetes were recently identified in the *HNF1B* (MODY5) gene on chromosome 17q12 (84–86) and the *WFS1* (Wolfram syndrome) gene on chromosome 4p16.1 (34, 87–89). Common variants in the *HNF1A* (MODY3) gene on chromosome 12q24.31 (26, 84, 85, 90–96) and the *HNF4A* (MODY1) gene on chromosome 20q13.12 (84, 92, 96–108) have been extensively studied, but no consistent results were obtained, pointing to very weak, if any, effects of these variants on type 2 diabetes risk.
- Human family linkage studies: positional cloning of genes located between or near diabetes-linked chromosomal markers turned out to be difficult due to: 1) the non-Mendelian mode of inheritance of human type 2 diabetes; and 2) the size of the chromosomal areas identified in this way that often encompass up to hundreds

of genes. Nevertheless, common diabetes-associated variants in *CAPN10* on chromosome 2q37.3 (109–118), *ENPP1* on chromosome 6q22–q23 (26, 32, 119–127), and *TCF7L2* on chromosome 10q25.3 (28–31, 34, 35, 45, 89, 128–161) were identified by this labor-intensive approach and replicated in several populations and ethnicities, and were confirmed in prospective studies and meta-analyses. *TCF7L2* was additionally confirmed by GWA studies. With an overall allelic relative risk of 1.56 (9), *TCF7L2* currently represents the most convincing diabetes risk gene.

The most recent and most successful approach to identify novel risk alleles is the hypothesis-free systematic genotyping of several hundred thousand SNPs in tens of thousands of cases and controls using high-density SNP arrays. A substantial drop in the cost of these arrays initiated a revolution in the genetics of complex diseases. Until now, the most frequently used arrays had approximately 500,000 SNPs spotted and covered nearly 65% of all known informative SNPs in the human genome with  $r^2 > 0.8$  (<http://www.illumina.com/downloads/GWASArrayWhitePaper.pdf>). In these GWA studies, the frequency of all these genotyped SNPs was then compared between cases and controls, and alleles significantly more frequent in cases than in controls (commonly assumed genome-wide significance level,  $P < 5 \cdot 10^{-8}$ ) are considered risk alleles. In early 2007, Sladek *et al.* (144) were the first not only to confirm *TCF7L2*, but also to identify four novel type 2 diabetes risk loci, namely *SLC30A8* (chromosome 8q24.11), *HHEX* (chromosome 10q23.33), *EXT2* (chromosome 11p12–p11), and the hypothetical gene LOC387761 (chromosome 11p12) using this methodology. Among these, *SLC30A8* (28–30, 34, 46, 89, 162–166) and *HHEX* (28–31, 34, 46, 161, 163, 164, 167–171) could be confirmed as diabetes risk genes in several subsequent case-control and prospective studies, whereas the association of variants in or near *EXT2* (31, 46, 166, 169) and LOC387761 (46, 166) with type 2 diabetes could not be replicated. Using SNP arrays, *FTO* on chromosome 16q12.2 was the next gene to be characterized as a reliable obesity and type 2 diabetes risk gene (28, 30, 31, 34, 35, 89, 162, 163, 169, 172, 173). Just a few months later, three back-to-back publications not only reported replication and, thus, confirmation of *HHEX*, *SLC30A8*, *TCF7L2*, *FTO*, *KCNJ11*, and *PPARG*, but also revealed, by GWA analysis, three novel diabetes risk loci: *CDKAL1* (chromosome 6p22.2), *IGF2BP2* (chromosome 3q27.2), and a genomic region between *CDKN2A* and *CDKN2B* on chromosome 9p21 (28–30). Robust replication of these new loci was provided shortly after (31, 34, 35, 46, 89, 161–164, 166, 167, 169, 174–178).

In 2008, a meta-analysis of GWA scans with data from a total of approximately 60,000 subjects delivered six additional risk loci with probably low effect sizes (odds ratios, 1.09–1.13), *i.e.*, *JAZF1* (chromosome 7p15.2–p15.1), *THADA* (chromosome 2p21), *ADAMTS9* (chromosome 3p14.1), *NOTCH2* (chromosome 1p13–p11), and two intergenic regions, one between *CDC123* and *CAMK1D* on chromosome 10p13 and another between *TSPAN8* and *LGR5* on chromosome 12q21–q22 (33). Among these, only *JAZF1*, *ADAMTS9*, and *NOTCH2* could be verified in two prospective studies up to now (34, 89). Very recently, confirmed diabetes risk alleles of *KCNQ1* on chromosome 11p15.5 were reported in Asian GWA studies that also included European replication cohorts (177, 179, 180). Finally, a meta-analysis of 13 GWA scans (~83,000 subjects) revealed common variation in the *MTNR1B* gene on chromosome 11q21–q22 that confers an increased risk for type 2 diabetes (181), and this was verified in cross-sectional and prospective studies published back to back (182, 183).

All of these genetic research efforts of the last decade have led to the identification of at least 27 (confirmed and potential) type 2 diabetes susceptibility genes, and their time-course of discovery or initial publication is depicted in Fig. 1.

### III. Gene Variants Affecting Insulin Secretion

Insulin secretion is regulated by different humoral stimuli that activate respective molecular pathways within pancreatic  $\beta$ -cells. The two most important physiological stimuli are glucose and incretins. Glucose triggers insulin release via a complex series of cellular events (184): glu-

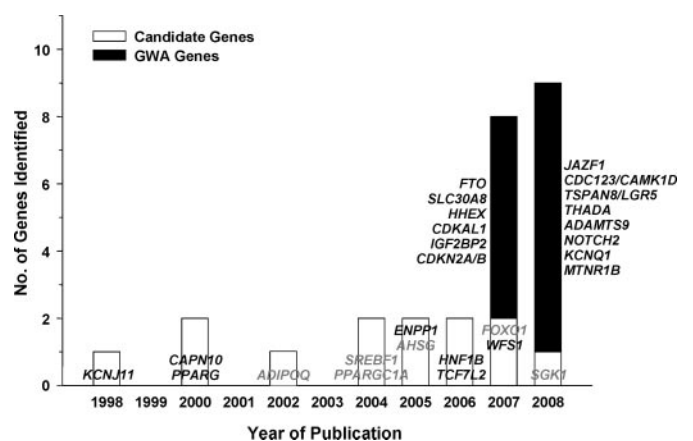

**FIG. 1.** Time-course of the discovery/initial publication of confirmed and potential type 2 diabetes risk genes. The numbers of genes identified by candidate gene approaches are represented by white bars and those of genes derived from GWA studies by black bars. Confirmed risk genes are given in black letters and potential risk genes in gray letters.



cose is taken up via glucose transporters, phosphorylated by glucokinase, and metabolized via the glycolytic pathway and the tricarboxylic acid cycle; during glucose catabolism, ATP is generated that causes closure of the ATP-sensitive potassium channel; this provokes membrane depolarization and subsequent opening of a voltage-dependent calcium channel; calcium influx raises the cytosolic calcium concentration, and this promotes exocytosis of insulin granules. Incretins, like glucagon-like peptide 1 (GLP-1) and gastric inhibitory polypeptide (GIP), enhance (in the presence of glucose) insulin secretion via binding to specific G protein-coupled transmembrane receptors; this activates adenylyl cyclase and leads to cAMP formation; cAMP activates protein kinase A, which in turn mediates induction of the insulin gene and exocytosis of insulin granules (185).

It has been hypothesized for a while that individual differences in insulin secretion capacity are predominantly determined by genetics (186, 187). This is now clearly strengthened by the finding that, among the 27 confirmed (Table 1) and potential (Table 2) diabetes risk genes mentioned above, 18 genes affect  $\beta$ -cell function, namely *CAPN10* (188), *CDC123/CAMK1D* (189), *CDKAL1* (166, 174, 190–193), *CDKN2A/B* (34, 167, 193), *ENPP1* (194), *FOXO1* (77), *HHEX* (167, 190, 193, 195, 196), *IGF2BP2* (34, 166, 167), *JAZF1* (189), *KCNJ11* (38, 41, 193), *KCNQ1* (180, 197), *MTNR1B* (181–183), *PPARGC1A* (198), *SGK1* (79), *SLC30A8* (34, 166), *TCF7L2* (129, 134, 138, 160, 193, 199, 200), *TSPAN8/LGR5* (189), and *WFS1* (201–203). This was revealed by calculating fasting state- and oral glucose tolerance test (OGTT)-derived (plasma insulin- and C-peptide-based) surrogate indices for insulin secretion that do not allow further dissection of the aspects of  $\beta$ -cell function affected, such as insulin maturation, glucose sensitivity, or incretin sensitivity. From these rough estimates of  $\beta$ -cell function, pathomechanisms showing how these common gene variants impair  $\beta$ -cell function were only proposed for the biological candidates *KCNJ11*, *FOXO1*, and *SGK1*, which have been well studied *in vitro* as well as in mice *in vivo*.

*KCNJ11* (potassium inwardly-rectifying channel, subfamily J, member 11; OMIM entry no. 600937) encodes the pore-forming subunit Kir6.2 of the ATP-sensitive potassium channel of  $\beta$ -cells, which couples glucose sensing with membrane depolarization and exocytosis of insulin granules. The best studied and confirmed diabetes risk variant E23K (rs5219) was shown *in vitro* to increase the probability of the channel's open state, to enhance its activity, and to impair its ATP sensitivity, thereby inhibiting  $\beta$ -cell excitability and insulin release (204, 205). Furthermore, the same variant was suggested to impair insulin secretion due to its enhanced response to the channel-ac-

tivating effect of intracellular acyl coenzyme As, fatty acid metabolites known to be elevated in obese and type 2 diabetic subjects (206).

By scanning the *FOXO1* (forkhead box O1; OMIM entry no. 136533) locus for common genetic variation associated with prediabetic traits, we very recently identified two weakly linked intronic SNPs (rs2721068 and rs17446614;  $r^2 = 0.5$ ) that were associated with reduced insulin secretion (77). The *FOXO1* gene encodes a transcription factor of the forkhead box family, and its product FoxO1 is known to mediate insulin actions in liver, skeletal muscle, and adipose tissue (207). In addition, *FOXO1* is expressed in pancreatic  $\beta$ -cells, and FoxO1's nuclear localization exerts inhibitory effects on insulin resistance-induced  $\beta$ -cell mass expansion and  $\beta$ -cell proliferation via repression of *PDX1* (208–210). Insulin- or incretin-stimulated activation of the serine/threonine kinase Akt, via insulin receptor substrate 2 and phosphatidylinositol 3'-kinase, promotes FoxO1 phosphorylation and nuclear exclusion followed by *PDX1* induction (209, 211–213). *PDX1* expression stimulates  $\beta$ -cell proliferation and function (214). Due to this central function of FoxO1 within pancreatic  $\beta$ -cells, it appears obvious that the aforementioned SNPs (probably affecting *FOXO1* expression) exert direct effects inside the  $\beta$ -cell, although their molecular functionality remains to be proven.

The biological candidate and potential diabetes risk gene *SGK1* (serum/glucocorticoid-regulated kinase 1; OMIM entry no. 602958) encodes the ubiquitously expressed serine/threonine kinase Sgk1 which displays highest expression levels in the pancreas (215). Sgk1 participates in glucose homeostasis by regulating cellular glucose transport (216–219), insulin signaling (220), and insulin secretion (221, 222). In  $\beta$ -cells, Sgk1 stimulates the activity of voltage-gated potassium channels, which in turn reduces calcium influx and inhibits insulin release (221). Another Sgk1-dependent molecular mechanism that impairs insulin secretion is activation of the sodium/potassium ATPase during plasma membrane repolarization (222). In support of these functions in  $\beta$ -cells, a SNP in the 3'-flanking region of the *SGK1* gene (rs9402571) was recently shown to affect insulin secretion and diabetes risk in different European populations (79).

#### A. SNP effects on glucose-stimulated insulin secretion

The procedures best suited to assess glucose sensitivity of insulin secretion *in vivo* are measurement of plasma insulin, or even better C-peptide (insulin is rapidly cleared by the liver), levels during a frequently sampled iv glucose tolerance test or a hyperglycemic clamp. These state-of-the-art methods allow determination of the individual's insulin secretion capacity in response to glucose and in the absence of interfering incretin effects. Based on these tech-

**TABLE 1.** Effects of SNPs in confirmed type 2 diabetes genes on prediabetic traits

| Gene                 | Chr. | Tissue expression (reproductive system not included)                                                                                                                   | Variants (app. RAF in Europeans)                    | Risk allele effects                                                                                                               |
|----------------------|------|------------------------------------------------------------------------------------------------------------------------------------------------------------------------|-----------------------------------------------------|-----------------------------------------------------------------------------------------------------------------------------------|
| <i>ADAMTS9</i>       | 3    | Skeletal muscle, breast, thymus, kidney, prostate, pancreas, heart, lung, spinal cord, brain, all fetal tissues                                                        | rs4607103 (80%)                                     | Unknown                                                                                                                           |
| <i>CAPN10</i>        | 2    | Thymus, colon, bladder, brain, spleen, prostate, skeletal muscle, pancreas, heart, lymph node, lung, kidney                                                            | rs3792267 (70%), rs3842570 (40%), rs5030952 (90%)   | Glucose-stimulated insulin secretion ↓; proinsulin conversion ↓; whole-body insulin sensitivity ↓                                 |
| <i>CDC123/CAMK1D</i> | 10   | Bone marrow, smooth muscle, kidney, prostate, colon, bladder, spleen, lung, lymph node, skin, breast, brain, liver, thymus/skin, retina, spleen, skeletal muscle, lung | rs12779790 (20%)                                    | Insulin secretion ↓                                                                                                               |
| <i>CDKAL1</i>        | 6    | Bone marrow, breast, liver, spleen, prostate, retina, brain, lung, kidney, thymus, pancreas, skeletal muscle                                                           | rs7754840 (30%)                                     | Glucose-stimulated insulin secretion ↓; proinsulin conversion ↓                                                                   |
| <i>CDKN2A/CDKN2B</i> | 9    | Ubiquitous/bladder, colon, lung, spleen, skin, liver, breast, skeletal muscle, prostate, kidney, brain, pancreas, adipose tissue                                       | rs10811661 (80%)                                    | Glucose-stimulated insulin secretion ↓                                                                                            |
| <i>ENPP1</i>         | 6    | Thyroid gland, kidney, skeletal muscle, breast, liver, skin, thymus, salivary gland, brain capillaries                                                                 | rs1044498/K121Q (10%)                               | Whole-body insulin sensitivity ↓; insulin secretion ↓                                                                             |
| <i>FTO</i>           | 16   | Brain, pancreas, skeletal muscle, prostate, retina, heart, skin, breast, lung, kidney, liver, thymus, fetal brain, fetal kidney, fetal liver                           | rs8050136 (40%), rs9939609 (40%)                    | Overall fat mass ↑; energy intake ↑; cerebrocortical insulin sensitivity ↓                                                        |
| <i>HHEX</i>          | 10   | Thyroid gland, brain, lymph node, spleen, liver, lung, kidney, breast, pancreas, thymus, skin, prostate, fetal pancreas                                                | rs7923837 (60%)                                     | Glucose-stimulated insulin secretion ↓                                                                                            |
| <i>HNF1B</i>         | 17   | Colon, kidney, liver, thymus, retina, pancreas, prostate, lung                                                                                                         | rs757210 (40%)                                      | Unknown                                                                                                                           |
| <i>IGF2BP2</i>       | 3    | Smooth muscle, colon, lung, retina, skeletal muscle, skin, kidney, thymus, fetal liver, fetal brain, pancreas                                                          | rs4402960 (30%)                                     | Glucose-stimulated insulin secretion ↓                                                                                            |
| <i>JAZF1</i>         | 7    | Lymph node, retina, pancreas, thymus, brain, skin, liver, skeletal muscle, lung, spleen, prostate                                                                      | rs864745 (50%)                                      | Insulin secretion ↓                                                                                                               |
| <i>KCNJ11</i>        | 11   | Pancreas, heart, pituitary gland, skeletal muscle, brain, smooth muscle                                                                                                | rs5219/E23K (50%)                                   | Insulin secretion ↓; glucose-dependent suppression of glucagon secretion ↓                                                        |
| <i>KCNQ1</i>         | 11   | Thyroid gland, bone marrow, prostate, heart, pancreas, lung, thymus, skin, liver, kidney                                                                               | rs2237892 (90%), rs151290 (80%)                     | Insulin secretion ↓; incretin secretion ↓                                                                                         |
| <i>MTNR1B</i>        | 11   | Retina, brain, pancreas                                                                                                                                                | rs10830963 (30%), rs10830962 (40%), rs4753426 (50%) | Glucose-stimulated insulin secretion ↓                                                                                            |
| <i>NOTCH2</i>        | 1    | Lung, skin, thyroid gland, skeletal muscle, smooth muscle, kidney, bladder, lymph node, breast, colon, prostate, spleen, brain, thymus, heart, liver, pancreas         | rs10923931 (10%)                                    | Unknown                                                                                                                           |
| <i>PPARG</i>         | 3    | Adipose tissue, colon, lung, kidney, breast, spleen, skin, prostate, bone marrow, brain, skeletal muscle, liver                                                        | rs1801282/P12A (80%)                                | Whole-body insulin sensitivity ↓; adipose tissue insulin sensitivity ↓; insulin clearance ↓                                       |
| <i>SLC30A8</i>       | 8    | Pancreas, kidney, lung, breast, amygdala                                                                                                                               | rs13266634/R325W (70%)                              | Glucose-stimulated insulin secretion ↓; proinsulin conversion ↓                                                                   |
| <i>TCF7L2</i>        | 10   | Brain, lung, bone marrow, thyroid gland, colon, pancreas, skin, breast, kidney, liver, thymus, prostate                                                                | rs7903146 (30%), rs12255372 (30%), rs7901695 (30%)  | Incretin-stimulated insulin secretion ↓; proinsulin conversion ↓; whole-body insulin sensitivity ↓; hepatic insulin sensitivity ↓ |

(Continued)

**TABLE 1.** Continued

| Gene               | Chr. | Tissue expression (reproductive system not included)                                                                   | Variants (app. RAF in Europeans) | Risk allele effects                     |
|--------------------|------|------------------------------------------------------------------------------------------------------------------------|----------------------------------|-----------------------------------------|
| <i>THADA</i>       | 2    | Ubiquitous                                                                                                             | rs7578597/T1187A (90%)           | Unknown                                 |
| <i>TSPAN8/LGR5</i> | 12   | Spinal cord, colon, skeletal muscle, prostate, liver, lung, pancreas, kidney/skeletal muscle, skin, brain, spinal cord | rs7961581 (30%)                  | Insulin secretion ↓                     |
| <i>WFS1</i>        | 4    | Ubiquitous                                                                                                             | rs10010131 (60%)                 | Incretin-stimulated insulin secretion ↓ |

Genes are listed in alphabetical order. Chr., Chromosome; RAF, risk allele frequency.

niques, it was demonstrated that glucose sensitivity of  $\beta$ -cells is influenced by variants in *CAPN10* (223), *CDKAL1* (192, 224), *CDKN2A/B* (167), *HHEX* (195, 225), *IGF2BP2* (167, 224), *MTNR1B* (182, 226), and *SLC30A8* (195, 227).

Three unlinked intronic polymorphisms in *CAPN10* (calpain 10; OMIM entry no. 605286), *i.e.*, SNP rs3792267 (formerly UCSNP-43), the insertion/deletion polymorphism rs3842570 (formerly UCSNP-19), and SNP rs5030952 (formerly UCSNP-63), as well as haplotype combinations thereof probably confer a modest risk of type 2 diabetes. The most investigated confirmed diabetes risk SNP rs3792267 was shown to alter glucose-stimulated insulin secretion (223), and it is conceivable that this is mediated by altered *CAPN10* expression. Calpain 10 is an important molecule in peripheral glucose-sensing cells as well as in pancreatic  $\beta$ -cells (228). It belongs to the calcium-dependent papain domain-containing family of cysteine proteases (228). In  $\beta$ -cells, calpain 10 overexpression enhances insulin secretion (229). Molecularly, calpain 10 was suggested to function as a calcium sensor that, upon increments in cytosolic calcium, triggers actin reorganization and stimulates exocytosis of insulin granules by proteolytic cleavage of synaptosomal-associated protein of 25 kDa, an essential com-

ponent of the granule/target membrane docking and fusion machinery (229, 230).

In recent GWA studies, the *HHEX* (hematopoietically expressed homeobox; OMIM entry no. 604420) locus was newly identified and confirmed as a diabetes risk locus, and a SNP (rs7923837) located in the 3'-flanking region of the gene was subsequently found to associate with glucose-stimulated insulin secretion (195, 225). *HHEX* encodes a transcription factor that is expressed in the embryonic ventral-lateral foregut that gives rise to the ventral pancreas and the liver (231). *Hhex* knockout in mice was shown to impair proliferation of endodermal epithelial cells, positioning of ventral foregut endoderm cells relative to the mesoderm, and budding and morphogenesis of the ventral pancreas (231). This genetic manipulation finally provoked lethality during mid-gestation (231). Although its functionality remains to be established, the association of SNP rs7923837 with differences in glucose-stimulated insulin release could arise from mild alterations in the embryonic organogenesis of the ventral pancreas. This suggestion, however, awaits further physiological and molecular clarification.

*SLC30A8* [solute carrier family 30 (zinc transporter), member 8; OMIM entry no. 611145] displays prominent

**TABLE 2.** Effects of SNPs in selected potential type 2 diabetes genes on prediabetic traits

| Gene            | Chr. | Tissue expression (reproductive system not included)                                                                                                  | Variants (app. RAF in Europeans)                 | Risk allele effects                                    |
|-----------------|------|-------------------------------------------------------------------------------------------------------------------------------------------------------|--------------------------------------------------|--------------------------------------------------------|
| <i>ADIPOQ</i>   | 3    | Adipose tissue, heart, breast, thymus, brain, kidney                                                                                                  | rs266729 (30%), rs2241766 (20%), rs1501299 (70%) | Whole-body insulin sensitivity ↓                       |
| <i>AHSG</i>     | 3    | Liver, breast, skeletal muscle, brain                                                                                                                 | rs2077119 (50%)                                  | Adipose tissue insulin sensitivity ↓                   |
| <i>FOXO1</i>    | 13   | Lymph node, retina, bladder, kidney, bone marrow, thyroid gland, skin, pancreas, prostate, liver, lung, skeletal muscle, brain, heart, thymus, breast | rs2721068 (30%), rs17446614 (20%)                | Insulin secretion ↓                                    |
| <i>PPARGC1A</i> | 4    | Liver, kidney, colon, heart, lung, skeletal muscle, brain, pancreas, thymus, prostate                                                                 | rs8192678/G482S (40%)                            | Whole-body insulin sensitivity ↓ ; insulin secretion ↓ |
| <i>SGK1</i>     | 6    | Ubiquitous                                                                                                                                            | rs9402571 (80%)                                  | Insulin secretion ↓                                    |
| <i>SREBF1</i>   | 17   | Thymus, brain, prostate, skin, retina, bladder, pancreas, thyroid gland, breast, kidney, lung, spleen, adipose tissue, adrenal gland                  | rs1889018 (30%)                                  | Whole-body insulin sensitivity ↓                       |

Genes are listed in alphabetical order. Chr., Chromosome; RAF, risk allele frequency.

expression in the pancreas, and its product ZnT-8 acts as a zinc transporter in the secretory granules of  $\beta$ -cells providing zinc for insulin maturation and storage (232, 233). This important molecular function, together with the confirmed association of the *SLC30A8* variant R325W (rs13266634) with type 2 diabetes, renders this gene a very plausible candidate for  $\beta$ -cell dysfunction. In keeping with this, implication of the R325W variant in glucose-stimulated insulin secretion could clearly be demonstrated (195, 227). Interestingly, the same authors reported lack of association with insulin secretion as measured during an OGTT. Thus, R325W could also exert additional insulin secretion-modulating effects that mask this variant's direct effect on glucose-stimulated insulin secretion. These alternative mechanisms remain to be established.

Although confirming *in vivo* data are still lacking, a study published in 2008 provided convincing *ex vivo* evidence that the potential type 2 diabetes risk SNP rs8192678 in the *PPARGC1A* (peroxisome proliferator-activated receptor  $\gamma$ , coactivator 1  $\alpha$ ; OMIM entry no. 604517) gene, which encodes the amino acid exchange G482S in this gene's product PGC-1 $\alpha$ , markedly reduces human pancreatic islet *PPARGC1A* expression and concomitantly impairs glucose-stimulated insulin secretion (198). The mechanistic relevance of PGC-1 $\alpha$  for insulin secretion of human pancreatic islets was proven by downregulation of *PPARGC1A* expression using RNA interference (198). The effect of the G482S variant on glucose-stimulated insulin secretion was explained by the role of PGC-1 $\alpha$  as a central regulator of mitochondrial function (Ref. 234 and Section IV) and the importance of mitochondrial ATP formation for stimulus-secretion coupling in  $\beta$ -cells (235).

The molecular pathways by which the novel GWA-derived confirmed diabetes risk SNPs in or near *CDKAL1* (rs7754840), *IGF2BP2* (rs4402960), *CDKN2A/B* (rs10811661), and *MTNR1B* (rs10830963, rs10830962, rs4753426) affect glucose-stimulated insulin secretion, as reported (167, 182, 192, 224, 226), are currently unclear due to these genes' broad expression profile and/or unknown pancreas-specific functions.

### B. SNP effects on incretin sensitivity or incretin secretion

The secretory response of pancreatic  $\beta$ -cells is markedly enhanced by incretins. Thus, both incretin production/release by enteroendocrine cells and incretin signaling in  $\beta$ -cells represent important determinants of insulin secretion.

Recently, two moderately linked intronic SNPs (rs7903146 and rs12255372;  $r^2 = 0.7$ ) in the confirmed diabetes risk gene *TCF7L2* [transcription factor 7-like 2 (T-cell-specific, HMG-box); OMIM entry no. 602228] were shown to affect GLP-1 responsiveness of  $\beta$ -cells, as

evidenced by a hyperglycemic clamp combined with GLP-1 infusion (199). This was confirmed by comparison of the effect of the representative SNP rs7903146 on insulin secretion upon an oral *vs.* an iv glucose load (200). Plasma GLP-1 levels were not different between the genotypes (199, 200). *TCF7L2* encodes a component of the bipartite transcription factor complex  $\beta$ -catenin/transcription factor 7-like 2 that is involved in the Wnt signaling pathway (236). Using knockdown by RNA interference and overexpression by transfection, it was demonstrated, in human and murine islets, that *TCF7L2* is required for  $\beta$ -cell survival and  $\beta$ -cell proliferation as well as for glucose- and incretin-stimulated insulin secretion (237). Furthermore, expression of the insulin gene was found to strongly correlate with *TCF7L2* expression (200) and was decreased after *TCF7L2* knockdown, suggesting that the insulin gene represents a direct target gene of transcription factor 7-like 2 (238). Importantly, novel results of Maedler's group (239) revealed that the expression of GLP-1 and GIP receptors in human islets likewise depends on the presence of transcription factor 7-like 2 providing a plausible explanation for this gene's involvement in incretin responsiveness of  $\beta$ -cells.

Using the hyperglycemic clamp method combined with GLP-1 infusion, we could very recently show also that an intronic SNP (rs10010131) in the confirmed diabetes risk gene *WFS1* [Wolfram syndrome 1 (wolframin); OMIM entry no. 606201] affects GLP-1-induced insulin secretion (203). Again, this was not associated with altered plasma incretin levels (203). Although the molecular role of the ubiquitously expressed *WFS1* gene in incretin responsiveness is far from being understood, its product wolframin clearly controls  $\beta$ -cell functions: *Wfs1* knockout mice develop glucose intolerance and overt diabetes due to increased  $\beta$ -cell endoplasmic reticulum stress, reduced  $\beta$ -cell proliferation, progressive apoptotic  $\beta$ -cell loss, and hence insufficient insulin secretion (240–242).

Confirmed diabetes risk SNPs in the *KCNQ1* (potassium voltage-gated channel, KQT-like subfamily, member 1; OMIM entry no. 607542) gene were recently found to associate with insulin secretion after an OGTT, but not an iv glucose tolerance test (197). Interestingly, one of these intronic SNPs (rs151290) was the first diabetes risk variant described to affect plasma GIP and GLP-1 levels (197). Whether this gene's product, a voltage-gated potassium channel, plays a role in incretin production/secretion of enteroendocrine cells remains to be shown in mouse models and *in vitro* experiments.

### C. SNP effects on proinsulin conversion

The insulin gene encodes a monomeric precursor protein called proinsulin that comprises, from the N to the C terminus, the insulin B-chain sequence, the C-peptide, and



the A-chain sequence. During insulin maturation in the endoplasmic reticulum and Golgi complex, proinsulin is cleaved by proprotein convertases 1 and 2 and carboxypeptidase E and converted into the mature heterodimeric insulin molecule consisting of one A- and one B-chain (and C-peptide produced in equimolar ratios) (243). Only a small part (<10%) of the newly synthesized proinsulin escapes from this conversion process and gets into the circulation upon  $\beta$ -cell degranulation. The plasma proinsulin-to-insulin ratio therefore represents an estimate for the efficiency of proinsulin conversion.

First evidence of the existence of gene variants that determine the individual's efficiency of insulin maturation came from studies on the *CAPN10* gene (see *Section III.A*): using the poststimulus proinsulin-to-insulin ratio assessed during a hyperglycemic clamp, it was demonstrated that the genotype of SNP rs3792267 is associated with proinsulin conversion (223). With proinsulin-to-insulin ratios derived from the fasting state or an OGTT, also SNPs in the *TCF7L2* (158, 244–246), *SLC30A8* (245), and *CDKAL1* (245) loci were shown to affect proinsulin conversion. A suggestion about how these genes are involved in the insulin maturation process is up to now only available for *TCF7L2* (see *Section III.B*): the genes encoding proprotein convertase 1 and 2 (*PCSK1* and *PCSK2*) contain *bona fide* binding sites for transcription factor 7-like 2 in their promoters (244).

#### IV. Gene Variants Affecting Insulin Sensitivity

Insulin resistance provokes a critical challenge for the pancreatic  $\beta$ -cell that has to be compensated for by increments in insulin secretion to maintain normoglycemia. Thus, genetically determined  $\beta$ -cell defects may only become apparent in the presence of insulin resistance (9, 247). Insulin resistance is therefore considered an early and crucial step in the pathogenesis of type 2 diabetes. Undoubtedly, insulin resistance is strongly associated with obesity. Although the cause-effect relationship is far from being clear, insulin resistance is often suggested to result from obesity and to be predominantly caused by environmental factors, such as high-caloric diet and/or physical inactivity (248, 249). However, the genetic investigations of the last 10 yr revealed that certain gene variants impair insulin sensitivity without influencing the overall fat mass. Recent advances in the field, mainly based on candidate gene approaches, also strengthen the role of genetics in the establishment of insulin resistance.

Among the confirmed and potential type 2 diabetes risk genes described in Tables 1 and 2, eight genes influence whole-body or peripheral insulin sensitivity: *ADIPOQ* (47, 52, 250–257), *AHSG* (75, 258), *CAPN10* (259–264),

*ENPP1* (265–271), *PPARG* (272–283), *PPARGC1A* (284, 285), *SREBF1* (65), and *TCF7L2* (133, 151, 286, 287).

##### A. SNP effects on peripheral insulin sensitivity

Whole-body insulin sensitivity can be assessed either by using rough estimates derived from plasma glucose and insulin levels in the fasting state or, more state of the art, by calculating (plasma glucose- and insulin-based) indices derived from an OGTT or a hyperinsulinemic-euglycemic clamp. The measurement of tissue-specific insulin sensitivity is more intricate and requires tracer methods with stable isotopes or *ex vivo* investigations using freshly isolated tissue specimens.

The most intensely studied and confirmed diabetes risk SNP (rs1801282) with clear and obesity-independent effects on whole-body insulin sensitivity (272–283) is located in exon 2 of the *PPARG* (peroxisome proliferator-activated receptor  $\gamma$ ; OMIM entry no. 601487) gene and results in the amino acid exchange P12A. *PPARG* encodes the lipid-activated nuclear receptor and transcription factor peroxisome proliferator-activated receptor  $\gamma$  (PPAR $\gamma$ ). Two isoforms were described, PPAR $\gamma$ 1 and PPAR $\gamma$ 2, that are formed by alternative promoter usage and divergent splicing (288). Whereas PPAR $\gamma$ 1 is expressed in a number of tissues and cell types at moderate levels, the expression of PPAR $\gamma$ 2 is prominent in, but also largely restricted to, adipose tissue, where it represents a master regulator of fat cell differentiation (289). Because exon 2, harboring the P12A variant, is only present in the PPAR $\gamma$ 2-encoding transcript, it appears more than plausible that this variant exerts its insulin-sensitizing effect directly inside adipose tissue. That PPAR $\gamma$  is a central mediator of whole-body insulin sensitivity was clearly supported by the finding that PPAR $\gamma$  is the specific molecular target of thiazolidinediones, a clinically relevant class of insulin-sensitizing drugs (290, 291). The major allele of P12A, representing the risk allele, was shown to have a higher affinity to PPAR response elements and a higher ability to transactivate responsive promoters (272). How such a gain-of-function mutation can be reconciled with reduced antilipolytic insulin sensitivity of adipose tissue (275) is still a matter of debate. Nevertheless, increased release of fatty acids as a consequence of impaired adipose tissue insulin sensitivity represents an attractive molecular mechanism of this SNP because fatty acids are well known to impair insulin sensitivity of skeletal muscle and liver (292, 293).

The nonsynonymous confirmed diabetes risk SNP K121Q (rs1044498) in the *ENPP1* (ectonucleotide pyrophosphatase/phosphodiesterase 1; OMIM entry no. 173335) gene represents a functional variant with replicated effects on whole-body insulin sensitivity (265–271). *ENPP1* encodes a class II transmembrane glycoprotein that is identical to nucleotide diphosphatase (EC 3.6.1.9),



phosphodiesterase I (EC 3.1.4.1), and plasma cell glycoprotein 1 (PC-1). PC-1 was reported to directly interact with the insulin receptor  $\alpha$ -subunit and to inhibit the insulin receptor tyrosine kinase activity in human cells (294–297). Moreover, *Enpp1* overexpression in rodents provokes insulin resistance and hyperglycemia *in vivo* (298, 299). Finally, the PC-1 content of skeletal muscle and adipose tissue was shown to negatively correlate with whole-body insulin sensitivity and insulin receptor tyrosine kinase activity in humans (300, 301). The finding that the K121Q amino acid exchange results in a PC-1 molecule with stronger inhibitory effects on the insulin receptor tyrosine kinase (302) provides a plausible explanation for the reported SNP effects.

SNPs in *CAPN10* affect glucose-stimulated insulin secretion and proinsulin conversion (see Sections III.A and III.C). In addition, the *CAPN10* SNPs rs3792267, rs3842570, and rs5030952 affect whole-body insulin sensitivity (259–264). In accordance with this clinical observation, the risk allele of SNP rs3792267 was shown in Pima Indians to associate with reduced *CAPN10* mRNA levels in skeletal muscle (259, 303). Furthermore, pharmacological inhibition (304) and RNA interference-mediated knockdown (305) of calpain-10 in human skeletal muscle cells blocked insulin-stimulated glucose uptake downstream of Akt without affecting glycogen synthesis. Because calpain-10 is necessary to reorganize actin filaments and to stimulate exocytosis of intracellular vesicles, as was shown in pancreatic  $\beta$ -cells (see Section III.A) and 3T3-L1 adipocytes (306), impaired *CAPN10* expression was suggested to prevent the exocytosis of glucose transporter 4-containing vesicles, thus provoking insulin resistance of skeletal muscle and adipose tissue glucose uptake (307).

The *ADIPOQ* (adiponectin, C1Q, and collagen domain containing; OMIM entry no. 605441) gene encodes the adipocyte-derived hormone (adipokine) adiponectin. Adiponectin has potent antisteatotic, insulin-sensitizing, antiinflammatory, and atheroprotective properties (308), and its plasma levels are inversely correlated with overall and, in particular, visceral fat mass (309–313). Adiponectin's antisteatotic and insulin-sensitizing effects in skeletal muscle and liver were shown *in vitro* as well as in mice *in vivo* to be mediated by 1) the AMP-activated protein kinase/acetyl-coenzyme A carboxylase/carnitin-palmitoyl transferase 1 pathway that enhances fatty acid import into mitochondria, and 2) peroxisome proliferator-activated receptor  $\alpha$  activation that induces the expression of  $\beta$ -oxidative genes (314–317). The diabetes risk alleles of several SNPs located within the promoter region (with SNP rs266729 being the best explored), of the silent SNP rs2241766 in exon 2, and of SNP rs1501299 in intron 2

associate with decreased plasma adiponectin levels (48, 52, 57, 318–322). In line with the aforementioned molecular data from mouse and *in vitro* studies, hypoadiponectinemia due to these SNPs is associated with reduced whole-body insulin sensitivity (47, 52, 251, 255, 256).

The potential type 2 diabetes risk variant G482S (rs8192678) of the *PPARGC1A* gene (see Section III.A) was reported to decrease whole-body insulin sensitivity (284, 285) and to diminish exercise-induced increments in aerobic physical fitness (285). PGC-1 $\alpha$ , the *PPARGC1A* gene product, is an important coactivator of nuclear receptors, such as estrogen-related receptor  $\alpha$  and peroxisome proliferator-activated receptor  $\delta$ , and, via these transcription factors, controls the expression of genes involved in oxidative phosphorylation and  $\beta$ -oxidation (323–325). In consequence of these gene-regulatory events, PGC-1 $\alpha$  modulates mitochondrial activity, mitochondriogenesis, and the fiber-type composition of skeletal muscle (234). Thus, the impact of SNP G482S on aerobic physical fitness reflects the importance of PGC-1 $\alpha$  for mitochondrial function of skeletal muscle. The growing body of evidence pointing to a close connection between mitochondrial dysfunction, excess intramyocellular lipid deposition, and insulin resistance (326, 327) finally provides a plausible rationale for the effect of this SNP on insulin sensitivity.

We recently reported that several tagging SNPs, covering the complete common genetic variation (with  $r^2 > 0.8$ ) in the potential diabetes risk locus *AHSG* ( $\alpha 2$ -HS-glycoprotein; OMIM entry no. 138680), are functional insofar as they determine the plasma concentration of this gene's product  $\alpha 2$ -HS-glycoprotein, the human homolog of animal fetuin-A (328). Plasma  $\alpha 2$ -HS-glycoprotein levels are positively associated with whole-body insulin resistance and ectopic lipid deposition in the liver, the main site of its production (329, 330). Furthermore, SNP rs2077119 in the promoter region of the gene, probably affecting this gene's transcription rate, was shown to confer a reduction in adipose tissue insulin sensitivity, as evidenced by an impairment of insulin-stimulated lipogenesis and insulin-suppressed lipolysis (75, 258). At least two of  $\alpha 2$ -HS-glycoprotein's properties could explain this SNP's interference with insulin signaling in the adipocyte: first,  $\alpha 2$ -HS-glycoprotein directly binds the insulin receptor and inhibits the receptor's tyrosine kinase activity (331–335); and second,  $\alpha 2$ -HS-glycoprotein decreases the expression of the insulin-sensitizing adipokine adiponectin probably via induction of an inflammatory response in adipocytes and macrophages (336). How SNP rs2077119 ultimately affects adipose tissue insulin sensitivity remains to be molecularly elucidated.

A recent report in the literature also provided first evidence that the intronic SNP rs1889018 in the potential

type 2 diabetes risk gene *SREBF1* (sterol regulatory element-binding transcription factor 1; OMIM entry no. 184756), encoding the transcription factors sterol regulatory element-binding protein 1a and 1c, alters whole-body insulin sensitivity (65). Both gene products arise from the differential use of alternative transcription start sites and display broad tissue expression including all insulin-sensitive tissues (337). Although these transcription factors appear to play an essential role in lipogenesis (337) and insulin-dependent gene regulation (337–342), the exact molecular mechanism by which SNP rs1889018 impairs insulin sensitivity is still unknown.

Interestingly, SNPs in *TCF7L2* that were convincingly shown to affect  $\beta$ -cell function (see *Sections III.B and III.C*) concomitantly appear to influence whole-body (133, 151, 286) and hepatic insulin sensitivity (287). The molecular pathways underlying this observation are to date unclear, and future work should shed more light on this issue.

#### B. SNP effects on insulin clearance

The main sites of insulin clearance are the insulin-degrading, enzyme-expressing organs liver and kidney (343). Insulin clearance can be measured *in vivo* using C-peptide- and insulin-based indices from the hyperinsulinemic-euglycemic clamp (reflecting hepatic and peripheral insulin clearance) or from the OGTT or hyperglycemic clamp (both reflecting predominantly hepatic insulin extraction). The only SNP currently known to affect insulin clearance, as assessed with all three methods, is the P12A variation in the *PPARG* gene (see *Section IV.A*) (344). Because this SNP most probably exerts a direct role in adipose tissue, the idea of metabolic and/or humoral cross-talk between adipose tissue and the liver appears very attractive (344). In this respect, adipose tissue-derived fatty acids represent promising candidate mediators of this SNP's effect on insulin clearance because 1) P12A affects adipose tissue lipolysis (275), and 2) fatty acids promote hepatic steatosis and hepatic insulin resistance, which are close inverse correlates of hepatic insulin clearance (345).

#### C. SNP effects on cerebrocortical insulin sensitivity

A growing body of evidence indicates that the brain belongs to the insulin-sensitive organs, and insulin receptor expression was detected in the olfactory bulb, hypothalamus, cerebral cortex, cerebellum, and hippocampus (346, 347). Elegant studies in rodent models demonstrated that insulin blocks the release of orexigenic and stimulates the release of anorexigenic neuropeptides from hypothalamic neurons of the arcuate nucleus, thus inducing satiety and inhibiting food intake (348). Moreover, insulin appears to be involved in the regulation of neuronal survival,

learning, and memory (349). In humans, we were recently able to show that insulin stimulates cerebrocortical activity, as measured by magnetoencephalography, in lean, but not in obese, subjects (350). These data point to a potential modulation of cerebrocortical functions, such as vision, audition, touch, or control of voluntary movements, by insulin, and they demonstrate that cerebrocortical insulin resistance is a close reflection of obesity. In subsequent studies, we could furthermore demonstrate that the intronic confirmed diabetes risk SNP rs8050136 in the obesity gene *FTO* (see *Section VI*) impairs insulin-stimulated cerebrocortical activity, and interestingly, this was seen even after correction for body mass index (BMI) (351). This finding therefore provides first evidence that cerebrocortical insulin resistance results not only from environmental factors but also from obesity-independent effects of genetic variation.

#### V. Gene Variants Affecting Glucagon Secretion

Dysregulated hepatic glucose production, arising from increments in gluconeogenesis and/or glycogenolysis, represents another pathomechanism provoking hyperglycemia and type 2 diabetes (352). Hepatic glucose production is controlled by hormones: insulin suppresses, whereas glucagon (and catecholamines) stimulates both gluconeogenesis and glycogenolysis. Therefore, it is conceivable that, in addition to impaired insulin secretion and reduced hepatic insulin sensitivity, increased glucagon secretion and/or enhanced hepatic glucagon sensitivity contribute to the dysregulation of glucose production (353). In fact, one SNP, namely the *KCNJ11* E23K variant (see *Section III*), was shown to impair glucose-dependent suppression of glucagon secretion, thereby causing elevated plasma glucagon levels during a hyperglycemic clamp (354). This finding is in good agreement with the presence of ATP-sensitive potassium channels in pancreatic  $\alpha$ -cells (355, 356) and the recently reported role of these channels in glucose-dependent suppression of glucagon secretion (357): increased glucose metabolism, via ATP formation, promotes closure of the ATP-sensitive potassium channel triggering membrane depolarization. In contrast to the situation in  $\beta$ -cells, membrane depolarization does not open a voltage-dependent calcium channel, but it inactivates an N-type calcium channel. This blocks the exocytosis of glucagon granules. Because the E23K variant of the potassium channel's Kir6.2 subunit leads to reduced ATP sensitivity (204, 205), the polymorphism probably blunts  $\alpha$ -cell excitability and, in this way, favors activation of N-type calcium channels and glucagon secretion.

## VI. Gene Variants Affecting Adiposity

Obesity is a major risk factor for type 2 diabetes mellitus (see *Section I*). Hence, genetic variation affecting adiposity is expected to likewise influence the diabetes risk. Indeed, a set of SNPs (including the representative SNPs rs8050136 and rs9939609) in the first intron of the *FTO* (fat mass- and obesity-associated; OMIM entry no. 610966) gene was recently found and, in the meantime, repeatedly confirmed to affect both overall adiposity (163, 172, 173, 358–373) and type 2 diabetes risk (28, 31, 34, 35, 89, 162, 163, 172, 173, 363) in cross-sectional and prospective studies and across several ethnic groups. As reported, the association with type 2 diabetes was abolished by adjustment for BMI (172, 173, 363), clearly demonstrating that the association of these SNPs with type 2 diabetes is fully explained by their effect on adiposity. On average, *FTO* SNP carriers display an increase in BMI of 0.4 kg/m<sup>2</sup> per risk allele (172). The *FTO* gene encodes a nuclear Fe(II)- and 2-oxoglutarate-dependent DNA demethylase (374) and, hence, could play a role in the reactivation of genes silenced by DNA methylation. In mice and humans, *FTO* expression was found to be most abundant in the brain, particularly in the hypothalamic nuclei governing energy balance (172, 374), and in mice, its hypothalamic expression was shown to be regulated by feeding and fasting (374). In accordance with this gene's hypothalamic expression, recent *in vivo* findings in humans provided clear evidence that *FTO* SNPs increase food intake (but not energy expenditure) (374–379). That the *FTO* gene is indeed of importance for human brain functions is additionally underscored by its reported impact on cerebrocortical insulin sensitivity (see *Section IV.C*).

In 2008, two SNPs located 3' of a second genetic locus, the *MC4R* gene, were shown to robustly associate with variation in BMI (~0.2 kg/m<sup>2</sup> per risk allele) (380). An association with type 2 diabetes could, however, not be demonstrated. Very recently, more than 15 novel obesity loci were identified by GWA analyses, and four of them (*GNPDA2*, *TMEM18*, *BCDIN3D/FAIM2*, and *NCR3/AIF1/BAT2*) also tended to associate with type 2 diabetes (381–383). This, however, awaits further confirmation by replication.

## VII. Summary and Perspective

During the last decade, at least 27 (confirmed and potential) diabetes susceptibility genes were identified (Fig. 1 and Tables 1 and 2), and the greatest success in type 2 diabetes genetics arose from the development and use, in large case-control cohorts, of high-density SNP arrays. Most of the genes, or better gene variants, could be con-

firmed in many ethnicities (e.g., *TCF7L2*, *SLC30A8*, *HHEX*, *CDKAL1*, *CDKN2A/B*, *IGF2BP2*, and *FTO*), whereas others, probably due to divergent risk allele frequencies, may have higher relevance for certain ethnic groups [e.g., *ENPP1* for African-Americans (384, 385)]. Recent studies also provided evidence that diabetes risk SNPs act in an additive manner to increase the diabetes risk (up to 4-fold, when assessing the GWA-derived SNPs only) (163, 386). Although significantly contributing to the type 2 diabetes risk, these gene-gene interactions do, however, not yet allow a substantially better disease prediction than clinical risk factors (e.g., BMI, age, gender, family history of diabetes, fasting glucose level, blood pressure, and plasma triglycerides) alone (34, 388, 389), nor do they explain the heritability of type 2 diabetes (386). These flaws may possibly be overcome by 1) the identification of further robust risk genes by applying new methods and strategies (see below), and 2) the fine-mapping, by “deep sequencing”, of the known genes' causal variants, which are supposed to be in linkage with and to display greater effect sizes than the array-derived “lead SNPs”. Notably, no gender-specific differences in the known genes' impact on the diabetes risk were observed. Furthermore, many of the identified SNPs are intronic or located in the 5'- or 3'-flanking regions of genes. How such noncoding SNPs influence the genes' function is not clear, but alteration of binding sites for transcription factors and enhancer-binding proteins with respective changes in the genes' transcription rate represents a conceivable and plausible hypothesis.

Subsequent to the identification of the risk SNPs, very elaborate *in vivo* methods and thoroughly phenotyped human cohorts enabled the initial characterization of their pathomechanisms (Tables 1 and 2). From Fig. 2, which depicts these gene variants' anatomical sites of action, it is evident that the majority affects  $\beta$ -cell function, and this might favor the notion that  $\beta$ -cell dysfunction is primarily determined by genetics, whereas insulin resistance predominantly results from environmental influences (9, 390). Of course, this could be true, and statistical heritability estimates ( $h^2$ ) from twin studies indeed suggest a stronger heritability of insulin secretion (ranging from 0.35 to 0.84) compared with insulin sensitivity (ranging from 0.28 to 0.55) (187, 391, 392). On the other hand, some reasons for insulin resistance genes appearing underrepresented among the identified type 2 diabetes susceptibility genes are conceivable: 1) There may indeed be fewer insulin resistance genes or risk alleles that, however, upon accumulation could confer a substantial increase in diabetes risk, but this remains to be determined. 2) The insulin resistance genes may strictly depend on the interaction with specific environmental factors to cause type 2



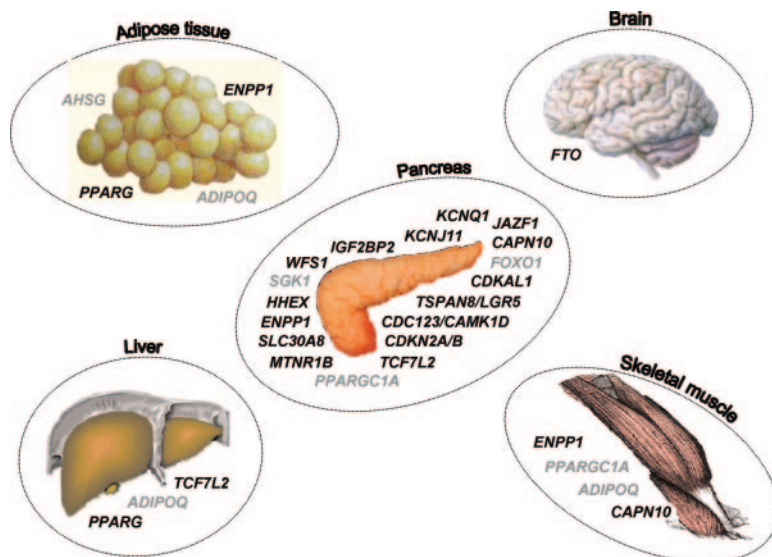

**FIG. 2.** Principal anatomical sites of action of confirmed and potential type 2 diabetes SNPs. Effects of type 2 diabetes risk SNPs were described in brain, pancreas, liver, skeletal muscle, and adipose tissue (see text for details). Most SNPs affect pancreatic  $\beta$ -cell function. Gene symbols represent SNPs in or near these gene loci. Confirmed risk genes are given in *black letters*, and potential risk genes in *gray letters*.

diabetes. These factors may be still unknown and, therefore, may not have been appropriately accounted for in previous studies. 3) Insulin resistance genes may be underrepresented on the SNP arrays used in the published GWA studies. The development of arrays with higher SNP densities and near-complete genome coverage will soon overcome this issue. 4) There may be a plethora of insulin resistance genes with each single one exerting only a very tiny effect. Their detection would require huge well-defined case-control cohorts encompassing several hundred thousand cases or, alternatively, large cohorts of several thousand subjects thoroughly phenotyped for whole-body or tissue-specific insulin sensitivity using very elaborate and time-consuming state-of-the-art measures, such as the hyperinsulinemic-euglycemic clamp or *in vivo* tracer methods, respectively.

As estimated from the currently achieved genome coverage, the next generation of high-density SNP arrays is expected to provide about half a dozen novel type 2 diabetes risk loci in the near future using the same case-control setting. Alternative settings, such as correlational analyses with state-of-the-art measures for glucose- and incretin-stimulated insulin secretion, whole-body and tissue-specific insulin sensitivity, will probably further increase this number. Moreover, future studies on the role of copy number variants, with their obvious impact on gene dosage, could once more extend our appreciation of the genetic component of type 2 diabetes. Finally, taking into account that gene-environment interactions contribute to the development of type 2 diabetes (393, 394), well-de-

finer intervention studies have a good potential to discover risk variants that remain cryptic in cross-sectional settings. The current emergence of diabetes-relevant genes susceptible to persistent and partly inheritable epigenetic regulations, *i.e.*, DNA methylation and histone modifications, further underscores the importance of gene-environment interactions and the complexity of type 2 diabetes genetics (198, 395, 396). Because epigenetic modifications clearly affect gene expression, the establishment of diabetes-related gene expression profiles of metabolically relevant tissues or easily available surrogate “tissues”, such as lymphocytes, could help identify novel candidate genes for type 2 diabetes.

What will be the clinical benefit of all this genetic knowledge beyond its use for prediction of the individual’s type 2 diabetes risk? One major advantage of knowing an at-risk person’s genotype could be to offer an individually tailored lifestyle intervention program to prevent or, at least, to significantly retard the

onset of overt diabetes. This aim requires extensive future work to understand the interaction between risk genes and lifestyle modifications, such as diet (this research area is called nutrigenomics) and exercise regimens (this research area is called physiogenomics). In this regard, data from the Diabetes Prevention Program provided evidence that behavioral intervention can mitigate or even abolish the diabetes risk conferred by *TCF7L2* or *ENPP1*, respectively (127, 129). In the Finnish Diabetes Prevention Study, physical activity was shown to reduce the type 2 diabetes risk of *PPARG* risk allele carriers (387). Another advantage of the genetic knowledge could be to offer type 2 diabetic patients an individually tailored pharmacological therapy with currently available or newly developed, *e.g.*, risk gene-targeting, antidiabetic drugs. Thus, future pharmacogenomic studies have to thoroughly investigate the interaction between risk genes and drugs. Understanding these interactions appears important also because it could help to reduce the therapeutic use of drugs (with their side effects) that are ineffective in certain genotypes.

## Acknowledgments

Address all correspondence and requests for reprints to: Prof. Hans-Ulrich Häring, Internal Medicine IV, Medical Clinic Tübingen, Otfried-Müller-Str. 10, D-72076 Tübingen, Germany. E-mail: hans-ulrich.haering@med.uni-tuebingen.de.

Disclosure Summary: The authors have nothing to disclose.



## References

1. Matthaei S, Stumvoll M, Kellerer M, Häring HU 2000 Pathophysiology and pharmacological treatment of insulin resistance. *Endocr Rev* 21:585–618
2. Wajchenberg BL 2007  $\beta$ -Cell failure in diabetes and preservation by clinical treatment. *Endocr Rev* 28:187–218
3. Martin BC, Warram JH, Krolewski AS, Bergman RN, Soeldner JS, Kahn CR 1992 Role of glucose and insulin resistance in development of type 2 diabetes mellitus: results of a 25-year follow-up study. *Lancet* 340:925–929
4. Butler AE, Janson J, Bonner-Weir S, Ritzel R, Rizza RA, Butler PC 2003  $\beta$ -Cell deficit and increased  $\beta$ -cell apoptosis in humans with type 2 diabetes. *Diabetes* 52:102–110
5. Hossain P, Kavar B, El Nahas M 2007 Obesity and diabetes in the developing world—a growing challenge. *N Engl J Med* 356:213–215
6. Tuomilehto J, Lindström J, Eriksson JG, Valle TT, Hämäläinen H, Ilanne-Parikka P, Keinänen-Kiukaanniemi S, Laakso M, Louheranta A, Rastas M, Salminen V, Uusitupa M 2001 Prevention of type 2 diabetes mellitus by changes in lifestyle among subjects with impaired glucose tolerance. *N Engl J Med* 344:1343–1350
7. Knowler WC, Barrett-Connor E, Fowler SE, Hamman RF, Lachin JM, Walker EA, Nathan DM 2002 Reduction in the incidence of type 2 diabetes with lifestyle intervention or metformin. *N Engl J Med* 346:393–403
8. Doria A, Patti ME, Kahn CR 2008 The emerging genetic architecture of type 2 diabetes. *Cell Metab* 8:186–200
9. Florez JC 2008 Newly identified loci highlight  $\beta$  cell dysfunction as a key cause of type 2 diabetes: where are the insulin resistance genes? *Diabetologia* 51:1100–1110
10. Knowler WC, Bennett PH, Hamman RF, Miller M 1978 Diabetes incidence and prevalence in Pima Indians: a 19-fold greater incidence than in Rochester, Minnesota. *Am J Epidemiol* 108:497–505
11. Zimmet PZ, McCarty DJ, de Courten MP 1997 The global epidemiology of non-insulin-dependent diabetes mellitus and the metabolic syndrome. *J Diabetes Complications* 11:60–68
12. Stern MP 1999 Genetic and environmental influences on type 2 diabetes mellitus in Mexican Americans. *Nutr Rev* 57:S66–S70
13. Gloyn AL, McCarthy MI 2001 The genetics of type 2 diabetes. *Best Pract Res Clin Endocrinol Metab* 15:293–308
14. Weires MB, Tausch B, Haug PJ, Edwards CQ, Wetter T, Cannon-Albright LA 2007 Familiality of diabetes mellitus. *Exp Clin Endocrinol Diabetes* 115:634–640
15. Elbein SC 1997 The genetics of human noninsulin-dependent (type 2) diabetes mellitus. *J Nutr* 127:1891S–1896S
16. Collins FS, Guyer MS, Charkravarti A 1997 Variations on a theme: cataloging human DNA sequence variation. *Science* 278:1580–1581
17. Hara K, Okada T, Tobe K, Yasuda K, Mori Y, Kadowaki H, Hagura R, Akanuma Y, Kimura S, Ito C, Kadowaki T 2000 The Pro12Ala polymorphism in PPAR  $\gamma$ 2 may confer resistance to type 2 diabetes. *Biochem Biophys Res Commun* 271:212–216
18. Mori H, Ikegami H, Kawaguchi Y, Seino S, Yokoi N, Takeda J, Inoue I, Seino Y, Yasuda K, Hanafusa T, Yamagata K, Awata T, Kadowaki T, Hara K, Yamada N, Gotoda T, Iwasaki N, Iwamoto Y, Sanke T, Nanjo K, Oka Y, Matsutani A, Maeda E, Kasuga M 2001 The Pro12 $\rightarrow$ Ala substitution in PPAR- $\gamma$  is associated with resistance to development of diabetes in the general population: possible involvement in impairment of insulin secretion in individuals with type 2 diabetes. *Diabetes* 50:891–894
19. Evans D, de Heer J, Hagemann C, Wendt D, Wolf A, Beisiegel U, Mann WA 2001 Association between the P12A and c1431t polymorphisms in the peroxisome proliferator activated receptor  $\gamma$  (PPAR  $\gamma$ ) gene and type 2 diabetes. *Exp Clin Endocrinol Diabetes* 109:151–154
20. Doney AS, Fischer B, Cecil JE, Boylan K, McGuigan FE, Ralston SH, Morris AD, Palmer CN 2004 Association of the Pro12Ala and C1431T variants of PPARG and their haplotypes with susceptibility to type 2 diabetes. *Diabetologia* 47:555–558
21. Kilpeläinen TO, Lakka TA, Laaksonen DE, Lindström J, Eriksson JG, Valle TT, Hämäläinen H, Ilanne-Parikka P, Keinänen-Kiukaanniemi S, Lindi V, Tuomilehto J, Uusitupa M, Laakso M 2008 SNPs in PPARG associate with type 2 diabetes and interact with physical activity. *Med Sci Sports Exerc* 40:25–33
22. Ghossaini M, Meyre D, Lobbens S, Charpentier G, Clément K, Charles MA, Tauber M, Weill J, Froguel P 2005 Implication of the Pro12Ala polymorphism of the PPAR- $\gamma$  2 gene in type 2 diabetes and obesity in the French population. *BMC Med Genet* 6:11
23. Hansen SK, Nielsen EM, Ek J, Andersen G, Glümer C, Carstensen B, Mouritzen P, Drivsholm T, Borch-Johnsen K, Jørgensen T, Hansen T, Pedersen O 2005 Analysis of separate and combined effects of common variation in KCNJ11 and PPARG on risk of type 2 diabetes. *J Clin Endocrinol Metab* 90:3629–3637
24. Moon MK, Cho YM, Jung HS, Park YJ, Yoon KH, Sung YA, Park BL, Lee HK, Park KS, Shin HD 2005 Genetic polymorphisms in peroxisome proliferator-activated receptor  $\gamma$  are associated with type 2 diabetes mellitus and obesity in the Korean population. *Diabet Med* 22:1161–1166
25. Jaziri R, Lobbens S, Aubert R, Péan F, Lahmidi S, Vaxillaire M, Porchay I, Bellili N, Tichet J, Balkau B, Froguel P, Marre M, Fumeron F 2006 The PPARG Pro12Ala polymorphism is associated with a decreased risk of developing hyperglycemia over 6 years and combines with the effect of the APM1 G-11391A single nucleotide polymorphism: the Data from an Epidemiological Study on the Insulin Resistance Syndrome (DESIR) study. *Diabetes* 55:1157–1162
26. Willer CJ, Bonnycastle LL, Conneely KN, Duren WL, Jackson AU, Scott LJ, Narisu N, Chines PS, Skol A, Stringham HM, Petric J, Erdos MR, Swift AJ, Enloe ST, Sprau AG, Smith E, Tong M, Doheny KF, Pugh EW, Watanabe RM, Buchanan TA, Valle TT, Bergman RN, Tuomilehto J, Mohlke KL, Collins FS, Boehnke M 2007 Screening of 134 single nucleotide polymorphisms (SNPs) previously associated with type 2 diabetes replicates association with 12 SNPs in nine genes. *Diabetes* 56:256–264
27. Florez JC, Jablonski KA, Sun MW, Bayley N, Kahn SE, Shamon H, Hamman RF, Knowler WC, Nathan DM, Altshuler D 2007 Effects of the type 2 diabetes-associated PPARG P12A polymorphism on progression to diabetes and response to troglitazone. *J Clin Endocrinol Metab* 92:1502–1509
28. Scott LJ, Mohlke KL, Bonnycastle LL, Willer CJ, Li Y,

- Duren WL, Erdos MR, Stringham HM, Chines PS, Jackson AU, Prokunina-Olsson L, Ding CJ, Swift AJ, Narisu N, Hu T, Pruim R, Xiao R, Li XY, Conneely KN, Riebow NL, Sprau AG, Tong M, White PP, Hetrick KN, Barnhart MW, Bark CW, Goldstein JL, Watkins L, Xiang F, Saramies J, Buchanan TA, Watanabe RM, Valle TT, Kinnunen L, Abecasis GR, Pugh EW, Doheny KF, Bergman RN, Tuomilehto J, Collins FS, Boehnke M 2007 A genome-wide association study of type 2 diabetes in Finns detects multiple susceptibility variants. *Science* 316:1341–1345
29. Saxena R, Voight BF, Lyssenko V, Burt NP, de Bakker PI, Chen H, Roix JJ, Kathiresan S, Hirschhorn JN, Daly MJ, Hughes TE, Groop L, Altshuler D, Almgren P, Florez JC, Meyer J, Ardlie K, Bengtsson Boström K, Isomaa B, Lettre G, Lindblad U, Lyon HN, Melander O, Newton-Cheh C, Nilsson P, Orho-Melander M, Råstam L, Seliotes EK, Taskinen MR, Tuomi T, Guiducci C, Berglund A, Carlson J, Gianniny L, Hackett R, Hall L, et al. 2007 Genome-wide association analysis identifies loci for type 2 diabetes and triglyceride levels. *Science* 316:1331–1336
  30. Zeggini E, Weedon MN, Lindgren CM, Frayling TM, Elliott KS, Lango H, Timpson NJ, Perry JR, Rayner NW, Freathy RM, Barrett JC, Shields B, Morris AP, Ellard S, Groves CJ, Harries LW, Marchini JL, Owen KR, Knight B, Cardon LR, Walker M, Hitman GA, Morris AD, Doney AS, McCarthy MI, Hattersley AT 2007 Replication of genome-wide association signals in UK samples reveals risk loci for type 2 diabetes. *Science* [Erratum (2007) 317:1035–1036] 316:1336–1341
  31. Herder C, Rathmann W, Strassburger K, Finner H, Grallert H, Huth C, Meisinger C, Gieger C, Martin S, Giani G, Scherbaum WA, Wichmann HE, Illig T 2008 Variants of the PPAR $\gamma$ , IGF2BP2, CDKAL1, HHEX, and TCF7L2 genes confer risk of type 2 diabetes independently of BMI in the German KORA studies. *Horm Metab Res* 40:722–726
  32. Gaulton KJ, Willer CJ, Li Y, Scott LJ, Conneely KN, Jackson AU, Duren WL, Chines PS, Narisu N, Bonnycastle LL, Luo J, Tong M, Sprau AG, Pugh EW, Doheny KF, Valle TT, Abecasis GR, Tuomilehto J, Bergman RN, Collins FS, Boehnke M, Mohlke KL 2008 Comprehensive association study of type 2 diabetes and related quantitative traits with 222 candidate genes. *Diabetes* 57:3136–3144
  33. Zeggini E, Scott LJ, Saxena R, Voight BF, Marchini JL, Hu T, de Bakker PI, Abecasis GR, Almgren P, Andersen G, Ardlie K, Boström KB, Bergman RN, Bonnycastle LL, Borch-Johnsen K, Burt NP, Chen H, Chines PS, Daly MJ, Deodhar P, Ding CJ, Doney AS, Duren WL, Elliott KS, Erdos MR, Frayling TM, Freathy RM, Gianniny L, Grallert H, Grarup N, Groves CJ, Guiducci C, Hansen T, Herder C, Hitman GA, Hughes TE, Isomaa B, et al. 2008 Meta-analysis of genome-wide association data and large-scale replication identifies additional susceptibility loci for type 2 diabetes. *Nat Genet* 40:638–645
  34. Lyssenko V, Jonsson A, Almgren P, Pulizzi N, Isomaa B, Tuomi T, Berglund G, Altshuler D, Nilsson P, Groop L 2008 Clinical risk factors, DNA variants, and the development of type 2 diabetes. *N Engl J Med* 359:2220–2232
  35. Sanghera DK, Ortega L, Han S, Singh J, Ralhan SK, Wander GS, Mehra NK, Mulvihill JJ, Ferrell RE, Nath SK, Kamboh MI 2008 Impact of nine common type 2 diabetes risk polymorphisms in Asian Indian Sikhs: PPAR $\gamma$ 2 (Pro12Ala), IGF2BP2, TCF7L2 and FTO variants confer a significant risk. *BMC Med Genet* 9:59
  36. Hani EH, Boutin P, Durand E, Inoue H, Permutt MA, Velho G, Froguel P 1998 Missense mutations in the pancreatic islet  $\beta$  cell inwardly rectifying K<sup>+</sup> channel gene (KIR6.2/BIR): a meta-analysis suggests a role in the polygenic basis of type II diabetes mellitus in Caucasians. *Diabetologia* 41:1511–1515
  37. Gloyn AL, Hashim Y, Ashcroft SJ, Ashfield R, Wiltshire S, Turner RC 2001 Association studies of variants in promoter and coding regions of  $\beta$ -cell ATP-sensitive K-channel genes SUR1 and Kir6.2 with type 2 diabetes mellitus (UKPDS 53). *Diabet Med* 18:206–212
  38. Nielsen EM, Hansen L, Carstensen B, Echwald SM, Drivsholm T, Glümer C, Thorsteinsson B, Borch-Johnsen K, Hansen T, Pedersen O 2003 The E23K variant of Kir6.2 associates with impaired post-OGTT serum insulin response and increased risk of type 2 diabetes. *Diabetes* 52:573–577
  39. Love-Gregory L, Wasson J, Lin J, Skolnick G, Suarez B, Permutt MA 2003 E23K single nucleotide polymorphism in the islet ATP-sensitive potassium channel gene (Kir6.2) contributes as much to the risk of type II diabetes in Caucasians as the PPAR $\gamma$  Pro12Ala variant. *Diabetologia* 46:136–137
  40. Barroso I, Luan J, Middelberg RP, Harding AH, Franks PW, Jakes RW, Clayton D, Schafer AJ, O’Rahilly S, Wareham NJ 2003 Candidate gene association study in type 2 diabetes indicates a role for genes involved in  $\beta$ -cell function as well as insulin action. *PLoS Biol* 1:E20
  41. Florez JC, Burt N, de Bakker PI, Almgren P, Tuomi T, Holmkvist J, Gaudet D, Hudson TJ, Schaffner SF, Daly MJ, Hirschhorn JN, Groop L, Altshuler D 2004 Haplotype structure and genotype-phenotype correlations of the sulfonylurea receptor and the islet ATP-sensitive potassium channel gene region. *Diabetes* 53:1360–1368
  42. Laukkanen O, Pihlajamäki J, Lindström J, Eriksson J, Valle TT, Hämäläinen H, Ilanne-Parikka P, Keinänen-Kiukaanniemi S, Tuomilehto J, Uusitupa M, Laakso M 2004 Polymorphisms of the SUR1 (ABCC8) and Kir6.2 (KCNJ11) genes predict the conversion from impaired glucose tolerance to type 2 diabetes. The Finnish Diabetes Prevention Study. *J Clin Endocrinol Metab* 89:6286–6290
  43. Doi Y, Kubo M, Ninomiya T, Yonemoto K, Iwase M, Arima H, Hata J, Tanizaki Y, Iida M, Kiyohara Y 2007 Impact of Kir6.2 E23K polymorphism on the development of type 2 diabetes in a general Japanese population: the Hisayama Study. *Diabetes* 56:2829–2833
  44. Sakamoto Y, Inoue H, Keshavarz P, Miyawaki K, Yamaguchi Y, Moritani M, Kunika K, Nakamura N, Yoshikawa T, Yasui N, Shiota H, Tanahashi T, Itakura M 2007 SNPs in the KCNJ11-ABCC8 gene locus are associated with type 2 diabetes and blood pressure levels in the Japanese population. *J Hum Genet* 52:781–793
  45. Vaxillaire M, Veslot J, Dina C, Proença C, Cauchi S, Charpentier G, Tichet J, Fumeron F, Marre M, Meyre D, Balkau B, Froguel P 2008 Impact of common type 2 diabetes risk polymorphisms in the DESIR prospective study. *Diabetes* 57:244–254
  46. Omori S, Tanaka Y, Takahashi A, Hirose H, Kashiwagi A, Kaku K, Kawamori R, Nakamura Y, Maeda S 2008 Association of CDKAL1, IGF2BP2, CDKN2A/B, HHEX,

- SLC30A8, and KCNJ11 with susceptibility to type 2 diabetes in a Japanese population. *Diabetes* 57:791–795
47. Hara K, Boutin P, Mori Y, Tobe K, Dina C, Yasuda K, Yamauchi T, Otobe S, Okada T, Eto K, Kadowaki H, Hagura R, Akanuma Y, Yazaki Y, Nagai R, Taniyama M, Matsubara K, Yoda M, Nakano Y, Tomita M, Kimura S, Ito C, Froguel P, Kadowaki T 2002 Genetic variation in the gene encoding adiponectin is associated with an increased risk of type 2 diabetes in the Japanese population. *Diabetes* 51:536–540
  48. Vasseur F, Helbecque N, Dina C, Lobbens S, Delannoy V, Gaget S, Boutin P, Vaxillaire M, Leprêtre F, Dupont S, Hara K, Clément K, Bihain B, Kadowaki T, Froguel P 2002 Single-nucleotide polymorphism haplotypes in both the proximal promoter and exon 3 of the APM1 gene modulate adipocyte-secreted adiponectin hormone levels and contribute to the genetic risk for type 2 diabetes in French Caucasians. *Hum Mol Genet* 11:2607–2614
  49. Gu HF, Abulaiti A, Ostenson CG, Humphreys K, Wahlestedt C, Brookes AJ, Efendic S 2004 Single nucleotide polymorphisms in the proximal promoter region of the adiponectin (APM1) gene are associated with type 2 diabetes in Swedish Caucasians. *Diabetes* 53(Suppl 1):S31–S35
  50. Gibson F, Froguel P 2004 Genetics of the APM1 locus and its contribution to type 2 diabetes susceptibility in French Caucasians. *Diabetes* 53:2977–2983
  51. Zacharova J, Chiasson JL, Laakso M 2005 The common polymorphisms (single nucleotide polymorphism [SNP] +45 and SNP +276) of the adiponectin gene predict the conversion from impaired glucose tolerance to type 2 diabetes: the STOP-NIDDM trial. *Diabetes* 54:893–899
  52. Vasseur F, Helbecque N, Lobbens S, Vasseur-Delannoy V, Dina C, Clément K, Boutin P, Kadowaki T, Scherer PE, Froguel P 2005 Hypoadiponectinaemia and high risk of type 2 diabetes are associated with adiponectin-encoding (ACDC) gene promoter variants in morbid obesity: evidence for a role of ACDC in diabetes. *Diabetologia* 48:892–899
  53. Tso AW, Sham PC, Wat NM, Xu A, Cheung BM, Rong R, Fong CH, Xu JY, Cheng KK, Janus ED, Lam KS 2006 Polymorphisms of the gene encoding adiponectin and glycaemic outcome of Chinese subjects with impaired glucose tolerance: a 5-year follow-up study. *Diabetologia* 49:1806–1815
  54. Schwarz PE, Govindarajulu S, Towers W, Schwanebeck U, Fischer S, Vasseur F, Bornstein SR, Schulze J 2006 Haplotypes in the promoter region of the ADIPOQ gene are associated with increased diabetes risk in a German Caucasian population. *Horm Metab Res* 38:447–451
  55. Yang WS, Yang YC, Chen CL, Wu IL, Lu JY, Lu FH, Tai TY, Chang CJ 2007 Adiponectin SNP276 is associated with obesity, the metabolic syndrome, and diabetes in the elderly. *Am J Clin Nutr* 86:509–513
  56. Liu H, Chen S, Zhang S, Xiao C, Ren Y, Tian H, Li X 2007 Adiponectin gene variation –4522C/T is associated with type 2 diabetic obesity and insulin resistance in Chinese. *J Genet Genomics* 34:877–884
  57. Li LL, Kang XL, Ran XJ, Wang Y, Wang CH, Huang L, Ren J, Luo X, Mao XM 2007 Associations between 45T/G polymorphism of the adiponectin gene and plasma adiponectin levels with type 2 diabetes. *Clin Exp Pharmacol Physiol* 34:1287–1290
  58. Gable DR, Matin J, Whittall R, Cakmak H, Li KW, Cooper J, Miller GJ, Humphries SE 2007 Common adiponectin gene variants show different effects on risk of cardiovascular disease and type 2 diabetes in European subjects. *Ann Hum Genet* 71:453–466
  59. Vimalaswaran KS, Radha V, Ramya K, Babu HN, Savitha N, Roopa V, Monalisa D, Deepa R, Ghosh S, Majumder PP, Rao MR, Mohan V 2008 A novel association of a polymorphism in the first intron of adiponectin gene with type 2 diabetes, obesity and hypoadiponectinemia in Asian Indians. *Hum Genet* 123:599–605
  60. Yang M, Qiu CC, Chen W, Xu LL, Yu M, Xiang HD 2008 Identification of a regulatory single nucleotide polymorphism in the adiponectin (APM1) gene associated with type 2 diabetes in Han nationality. *Biomed Environ Sci* 21:454–459
  61. Boström MA, Freedman BI, Langefeld CD, Liu L, Hicks PJ, Bowden DW 2009 Association of adiponectin gene polymorphisms with type 2 diabetes in an African American population enriched for nephropathy. *Diabetes* 58:499–504
  62. Laudes M, Barroso I, Luan J, Soos MA, Yeo G, Meirhaeghe A, Logie L, Vidal-Puig A, Schafer AJ, Wareham NJ, O'Rahilly S 2004 Genetic variants in human sterol regulatory element binding protein-1c in syndromes of severe insulin resistance and type 2 diabetes. *Diabetes* 53:842–846
  63. Eberlé D, Clément K, Meyre D, Sabbatou M, Vaxillaire M, Le Gall A, Ferré P, Basdevant A, Froguel P, Fougelle F 2004 SREBF-1 gene polymorphisms are associated with obesity and type 2 diabetes in French obese and diabetic cohorts. *Diabetes* 53:2153–2157
  64. Felder TK, Oberkofler H, Weitgasser R, Mackevics V, Krempler F, Paulweber B, Patsch W 2007 The SREBF-1 locus is associated with type 2 diabetes and plasma adiponectin levels in a middle-aged Austrian population. *Int J Obes (Lond)* 31:1099–1103
  65. Grarup N, Stender-Petersen KL, Andersson EA, Jørgensen T, Borch-Johnsen K, Sandbaek A, Lauritzen T, Schmitz O, Hansen T, Pedersen O 2008 Association of variants in the sterol regulatory element-binding factor 1 (SREBF1) gene with type 2 diabetes, glycemia, and insulin resistance: a study of 15,734 Danish subjects. *Diabetes* 57:1136–1142
  66. Oberkofler H, Linnemayr V, Weitgasser R, Klein K, Xie M, Iglseider B, Krempler F, Paulweber B, Patsch W 2004 Complex haplotypes of the PGC-1 $\alpha$  gene are associated with carbohydrate metabolism and type 2 diabetes. *Diabetes* 53:1385–1393
  67. Andrulionytė L, Zacharova J, Chiasson JL, Laakso M 2004 Common polymorphisms of the PPAR- $\gamma$ 2 (Pro12Ala) and PGC-1 $\alpha$  (Gly482Ser) genes are associated with the conversion from impaired glucose tolerance to type 2 diabetes in the STOP-NIDDM trial. *Diabetologia* 47:2176–2184
  68. Vimalaswaran KS, Radha V, Ghosh S, Majumder PP, Deepa R, Babu HN, Rao MR, Mohan V 2005 Peroxisome proliferator-activated receptor- $\gamma$  co-activator-1 $\alpha$  (PGC-1 $\alpha$ ) gene polymorphisms and their relationship to type 2 diabetes in Asian Indians. *Diabet Med* 22:1516–1521
  69. Barroso I, Luan J, Sandhu MS, Franks PW, Crowley V, Schafer AJ, O'Rahilly S, Wareham NJ 2006 Meta-analysis of the Gly482Ser variant in PPARGC1A in type 2 diabetes and related phenotypes. *Diabetologia* 49:501–505



70. Bhat A, Koul A, Rai E, Sharma S, Dhar MK, Bamezai RN 2007 PGC-1 $\alpha$  Thr394Thr and Gly482Ser variants are significantly associated with T2DM in two North Indian populations: a replicate case-control study. *Hum Genet* 121: 609–614
71. Rai E, Sharma S, Koul A, Bhat AK, Bhanwer AJ, Bamezai RN 2007 Interaction between the UCP2–866G/A, mtDNA 10398G/A and PGC-1 $\alpha$  p.Thr394Thr and p.Gly482Ser polymorphisms in type 2 diabetes susceptibility in North Indian population. *Hum Genet* 122:535–540
72. Zhang SL, Lu WS, Yan L, Wu MC, Xu MT, Chen LH, Cheng H 2007 Association between peroxisome proliferator-activated receptor- $\gamma$  coactivator-1 $\alpha$  gene polymorphisms and type 2 diabetes in southern Chinese population: role of altered interaction with myocyte enhancer factor 2C. *Chin Med J (Engl)* 120:1878–1885
73. Lai CQ, Tucker KL, Parnell LD, Adiconis X, García-Bailo B, Griffith J, Meydani M, Ordovás JM 2008 PPARGC1A variation associated with DNA damage, diabetes, and cardiovascular diseases: the Boston Puerto Rican Health Study. *Diabetes* 57:809–816
74. Siddiq A, Lepretre F, Hercberg S, Froguel P, Gibson F 2005 A synonymous coding polymorphism in the  $\alpha 2$ -Heremans-schmid glycoprotein gene is associated with type 2 diabetes in French Caucasians. *Diabetes* 54:2477–2481
75. Andersen G, Burgdorf KS, Sparsø T, Borch-Johnsen K, Jørgensen T, Hansen T, Pedersen O 2008 AHSG tag single nucleotide polymorphisms associate with type 2 diabetes and dyslipidemia: studies of metabolic traits in 7,683 white Danish subjects. *Diabetes* 57:1427–1432
76. Böttcher Y, Tönjes A, Enigk B, Scholz GH, Blüher M, Stumvoll M, Kovacs P 2007 A SNP haplotype of the forkhead transcription factor FOXO1A gene may have a protective effect against type 2 diabetes in German Caucasians. *Diabetes Metab* 33:277–283
77. Müssig K, Staiger H, Machicao F, Stancáková A, Kuusisto J, Laakso M, Thamer C, Machann J, Schick F, Claussen CD, Stefan N, Fritsche A, Häring HU 2009 Association of common genetic variation in the FOXO1 gene with  $\beta$ -cell dysfunction, impaired glucose tolerance, and type 2 diabetes. *J Clin Endocrinol Metab* 94:1353–1360
78. Schwab M, Lupescu A, Mota M, Mota E, Frey A, Simon P, Mertens PR, Floege J, Luft F, Asante-Poku S, Schaeffeler E, Lang F 2008 Association of SGK1 gene polymorphisms with type 2 diabetes. *Cell Physiol Biochem* 21:151–160
79. Friedrich B, Weyrich P, Stancáková A, Wang J, Kuusisto J, Laakso M, Sesti G, Succurro E, Smith U, Hansen T, Pedersen O, Machicao F, Schäfer S, Lang F, Risler T, Ullrich S, Stefan N, Fritsche A, Häring HU 2008 Variance of the SGK1 gene is associated with insulin secretion in different European populations: results from the TUEF, EUGENE2, and METSIM studies. *PLoS ONE* 3:e3506
80. Clee SM, Yandell BS, Schueler KM, Rabaglia ME, Richards OC, Raines SM, Kabara EA, Klass DM, Mui ET, Stapleton DS, Gray-Keller MP, Young MB, Stoehr JP, Lan H, Boronenkov I, Raess PW, Flowers MT, Attie AD 2006 Positional cloning of Sorcs1, a type 2 diabetes quantitative trait locus. *Nat Genet* 38:688–693
81. Goodarzi MO, Lehman DM, Taylor KD, Guo X, Cui J, Quiñones MJ, Clee SM, Yandell BS, Blangero J, Hsueh WA, Attie AD, Stern MP, Rotter JI 2007 SORCS1: a novel human type 2 diabetes susceptibility gene suggested by the mouse. *Diabetes* 56:1922–1929
82. Chadt A, Leicht K, Deshmukh A, Jiang LQ, Scherneck S, Bernhardt U, Dreja T, Vogel H, Schmolz K, Kluge R, Zierath JR, Hultschig C, Hoeben RC, Schürmann A, Joost HG, Al-Hasani H 2008 Tbc1d1 mutation in lean mouse strain confers leanness and protects from diet-induced obesity. *Nat Genet* 40:1354–1359
83. Dokmanovic-Chouinard M, Chung WK, Chevre JC, Watson E, Yonan J, Wiegand B, Bromberg Y, Wakae N, Wright CV, Overton J, Ghosh S, Sathe GM, Ammala CE, Brown KK, Ito R, LeDuc C, Solomon K, Fischer SG, Leibel RL 2008 Positional cloning of “Lisch-Like,” a candidate modifier of susceptibility to type 2 diabetes in mice. *PLoS Genet* 4:e1000137
84. Bonnycastle LL, Willer CJ, Conneely KN, Jackson AU, Burrill CP, Watanabe RM, Chines PS, Narisu N, Scott LJ, Enloe ST, Swift AJ, Duren WL, Stringham HM, Erdos MR, Riebow NL, Buchanan TA, Valle TT, Tuomilehto J, Bergman RN, Mohlke KL, Boehnke M, Collins FS 2006 Common variants in maturity-onset diabetes of the young genes contribute to risk of type 2 diabetes in Finns. *Diabetes* 55:2534–2540
85. Winckler W, Weedon MN, Graham RR, McCarroll SA, Purcell S, Almgren P, Tuomi T, Gaudet D, Boström KB, Walker M, Hitman G, Hattersley AT, McCarthy MI, Ardlic KG, Hirschhorn JN, Daly MJ, Frayling TM, Groop L, Altshuler D 2007 Evaluation of common variants in the six known maturity-onset diabetes of the young (MODY) genes for association with type 2 diabetes. *Diabetes* 56:685–693
86. Gudmundsson J, Sulem P, Steinthorsdottir V, Bergthorsson JT, Thorleifsson G, Manolescu A, Rafnar T, Gudbjartsson D, Agnarsson BA, Baker A, Sigurdsson A, Benediksdottir KR, Jakobsdottir M, Blondal T, Stacey SN, Helgason A, Gunnarsdottir S, Olafsdottir A, Kristinsson KT, Birgisdottir B, Ghosh S, Thorlacius S, Magnusdottir D, Stefansdottir G, Kristjansson K, Bagger Y, Wilensky RL, Reilly MP, Morris AD, Kimber CH, et al. 2007 Two variants on chromosome 17 confer prostate cancer risk, and the one in TCF2 protects against type 2 diabetes. *Nat Genet* 39:977–983
87. Sandhu MS, Weedon MN, Fawcett KA, Wasson J, Debenham SL, Daly A, Lango H, Frayling TM, Neumann RJ, Sherva R, Blech I, Pharoah PD, Palmer CN, Kimber C, Tavendale R, Morris AD, McCarthy MI, Walker M, Hitman G, Glaser B, Permutt MA, Hattersley AT, Wareham NJ, Barroso I 2007 Common variants in WFS1 confer risk of type 2 diabetes. *Nat Genet* 39:951–953
88. Franks PW, Rolandsson O, Debenham SL, Fawcett KA, Payne F, Dina C, Froguel P, Mohlke KL, Willer C, Olsson T, Wareham NJ, Hallmans G, Barroso I, Sandhu MS 2008 Replication of the association between variants in WFS1 and risk of type 2 diabetes in European populations. *Diabetologia* 51:458–463
89. van Hoek M, Dehghan A, Witteman JC, van Duijn CM, Uitterlinden AG, Oostra BA, Hofman A, Sijbrands EJ, Janssens AC 2008 Predicting type 2 diabetes based on polymorphisms from genome-wide association studies: a population-based study. *Diabetes* 57:3122–3128
90. Urhammer SA, Rasmussen SK, Kaisaki PJ, Oda N, Yamagata K, Møller AM, Fridberg M, Hansen L, Hansen T, Bell GI, Pedersen O 1997 Genetic variation in the hepatocyte nuclear



- factor-1  $\alpha$  gene in Danish Caucasians with late-onset NIDDM. *Diabetologia* 40:473–475
91. Babaya N, Ikegami H, Kawaguchi Y, Fujisawa T, Nakagawa Y, Hamada Y, Hotta M, Ueda H, Shintani M, Nojima K, Kawabata Y, Ono M, Yamada K, Shen GQ, Fukuda M, Ogihara T 1998 Hepatocyte nuclear factor-1 $\alpha$  gene and non-insulin-dependent diabetes mellitus in the Japanese population. *Acta Diabetol* 35:150–153
  92. Rissanen J, Wang H, Miettinen R, Kärkkäinen P, Kekäläinen P, Mykkänen L, Kuusisto J, Karhapää P, Niskanen L, Uusitupa M, Laakso M 2000 Variants in the hepatocyte nuclear factor-1 $\alpha$  and -4 $\alpha$  genes in Finnish and Chinese subjects with late-onset type 2 diabetes. *Diabetes Care* 23:1533–1538
  93. Winckler W, Burt NP, Holmkvist J, Cervin C, de Bakker PI, Sun M, Almgren P, Tuomi T, Gaudet D, Hudson TJ, Ardlie KG, Daly MJ, Hirschhorn JN, Altshuler D, Groop L 2005 Association of common variation in the HNF1 $\alpha$  gene region with risk of type 2 diabetes. *Diabetes* 54:2336–2342
  94. Weedon MN, Owen KR, Shields B, Hitman G, Walker M, McCarthy MI, Hattersley AT, Frayling TM 2005 A large-scale association analysis of common variation of the HNF1 $\alpha$  gene with type 2 diabetes in the U.K. Caucasian population. *Diabetes* 54:2487–2491
  95. Holmkvist J, Cervin C, Lyssenko V, Winckler W, Anevski D, Cilio C, Almgren P, Berglund G, Nilsson P, Tuomi T, Lindgren CM, Altshuler D, Groop L 2006 Common variants in HNF-1  $\alpha$  and risk of type 2 diabetes. *Diabetologia* 49:2882–2891
  96. Holmkvist J, Almgren P, Lyssenko V, Lindgren CM, Eriksson KF, Isomaa B, Tuomi T, Nilsson P, Groop L 2008 Common variants in maturity-onset diabetes of the young genes and future risk of type 2 diabetes. *Diabetes* 57:1738–1744
  97. Silander K, Mohlke KL, Scott LJ, Peck EC, Hollstein P, Skol AD, Jackson AU, Deloukas P, Hunt S, Stavrides G, Chines PS, Erdos MR, Narisu N, Conneely KN, Li C, Fingerlin TE, Dhanjal SK, Valle TT, Bergman RN, Tuomilehto J, Watanabe RM, Boehnke M, Collins FS 2004 Genetic variation near the hepatocyte nuclear factor-4 $\alpha$  gene predicts susceptibility to type 2 diabetes. *Diabetes* 53:1141–1149
  98. Love-Gregory LD, Wasson J, Ma J, Jin CH, Glaser B, Suarez BK, Permutt MA 2004 A common polymorphism in the upstream promoter region of the hepatocyte nuclear factor-4 $\alpha$  gene on chromosome 20q is associated with type 2 diabetes and appears to contribute to the evidence for linkage in an Ashkenazi Jewish population. *Diabetes* 53:1134–1140
  99. Damcott CM, Hoppman N, Ott SH, Reinhart LJ, Wang J, Pollin TI, O'Connell JR, Mitchell BD, Shuldiner AR 2004 Polymorphisms in both promoters of hepatocyte nuclear factor 4 $\alpha$  are associated with type 2 diabetes in the Amish. *Diabetes* 53:3337–3341
  100. Weedon MN, Owen KR, Shields B, Hitman G, Walker M, McCarthy MI, Love-Gregory LD, Permutt MA, Hattersley AT, Frayling TM 2004 Common variants of the hepatocyte nuclear factor-4 $\alpha$  P2 promoter are associated with type 2 diabetes in the U.K. population. *Diabetes* 53:3002–3006
  101. Hansen SK, Rose CS, Glümer C, Drivsholm T, Borch-Johnsen K, Jørgensen T, Pedersen O, Hansen T 2005 Variation near the hepatocyte nuclear factor (HNF)-4 $\alpha$  gene associates with type 2 diabetes in the Danish population. *Diabetologia* 48:452–458
  102. Winckler W, Graham RR, de Bakker PI, Sun M, Almgren P, Tuomi T, Gaudet D, Hudson TJ, Ardlie KG, Daly MJ, Hirschhorn JN, Groop L, Altshuler D 2005 Association testing of variants in the hepatocyte nuclear factor 4 $\alpha$  gene with risk of type 2 diabetes in 7,883 people. *Diabetes* 54:886–892
  103. Vaxillaire M, Dina C, Lobbens S, Dechaume A, Vasseur-Delannoy V, Helbecque N, Charpentier G, Froguel P 2005 Effect of common polymorphisms in the HNF4 $\alpha$  promoter on susceptibility to type 2 diabetes in the French Caucasian population. *Diabetologia* 48:440–444
  104. Hara K, Horikoshi M, Kitazato H, Ito C, Noda M, Ohashi J, Froguel P, Tokunaga K, Tobe K, Nagai R, Kadowaki T 2006 Hepatocyte nuclear factor-4 $\alpha$  P2 promoter haplotypes are associated with type 2 diabetes in the Japanese population. *Diabetes* 55:1260–1264
  105. Andrulionyte L, Laukkanen O, Chiasson JL, Laakso M 2006 Single nucleotide polymorphisms of the HNF4 $\alpha$  gene are associated with the conversion to type 2 diabetes mellitus: the STOP-NIDDM trial. *J Mol Med* 84:701–708
  106. Tanahashi T, Osabe D, Nomura K, Shinohara S, Kato H, Ichiishi E, Nakamura N, Yoshikawa T, Takata Y, Miyamoto T, Shiota H, Keshavarz P, Yamaguchi Y, Kunika K, Moritani M, Inoue H, Itakura M 2006 Association study on chromosome 20q11.21–13.13 locus and its contribution to type 2 diabetes susceptibility in Japanese. *Hum Genet* 120:527–542
  107. Lehman DM, Richardson DK, Jenkinson CP, Hunt KJ, Dyer TD, Leach RJ, Arya R, Abboud HE, Blangero J, Duggirala R, Stern MP 2007 P2 promoter variants of the hepatocyte nuclear factor 4 $\alpha$  gene are associated with type 2 diabetes in Mexican Americans. *Diabetes* 56:513–517
  108. Johansson S, Raeder H, Eide SA, Midthjell K, Hveem K, Søvik O, Molven A, Njølstad PR 2007 Studies in 3,523 Norwegians and meta-analysis in 11,571 subjects indicate that variants in the hepatocyte nuclear factor 4  $\alpha$  (HNF4A) P2 region are associated with type 2 diabetes in Scandinavians. *Diabetes* 56:3112–3117
  109. Horikawa Y, Oda N, Cox NJ, Li X, Orho-Melander M, Hara M, Hinokio Y, Lindner TH, Mashima H, Schwarz PE, del Bosque-Plata L, Horikawa Y, Oda Y, Yoshiuchi I, Colilla S, Polonsky KS, Wei S, Concannon P, Iwasaki N, Schulze J, Baier LJ, Bogardus C, Groop L, Boerwinkle E, Hanis CL, Bell GI 2000 Genetic variation in the gene encoding calpain-10 is associated with type 2 diabetes mellitus. *Nat Genet* 26:163–175
  110. Evans JC, Frayling TM, Cassell PG, Saker PJ, Hitman GA, Walker M, Levy JC, O'Rahilly S, Rao PV, Bennett AJ, Jones EC, Menzel S, Prestwich P, Simecek N, Wishart M, Dhillon R, Fletcher C, Millward A, Demaine A, Wilkin T, Horikawa Y, Cox NJ, Bell GI, Ellard S, McCarthy MI, Hattersley AT 2001 Studies of association between the gene for calpain-10 and type 2 diabetes mellitus in the United Kingdom. *Am J Hum Genet* 69:544–552
  111. Malecki MT, Moczulski DK, Klupa T, Wanic K, Cyganek K, Frey J, Sieradzki J 2002 Homozygous combination of calpain 10 gene haplotypes is associated with type 2 diabetes mellitus in a Polish population. *Eur J Endocrinol* 146:695–699
  112. Cassell PG, Jackson AE, North BV, Evans JC, Syndercombe-Court D, Phillips C, Ramachandran A, Snehalatha C,

- Gelding SV, Vijayaravaghan S, Curtis D, Hitman GA 2002 Haplotype combinations of calpain 10 gene polymorphisms associate with increased risk of impaired glucose tolerance and type 2 diabetes in South Indians. *Diabetes* 51:1622–1628
113. Weedon MN, Schwarz PE, Horikawa Y, Iwasaki N, Illig T, Holle R, Rathmann W, Selisko T, Schulze J, Owen KR, Evans J, Del Bosque-Plata L, Hitman G, Walker M, Levy JC, Sampson M, Bell GI, McCarthy MI, Hattersley AT, Frayling TM 2003 Meta-analysis and a large association study confirm a role for calpain-10 variation in type 2 diabetes susceptibility. *Am J Hum Genet* 73:1208–1212
  114. Iwasaki N, Horikawa Y, Tsuchiya T, Kitamura Y, Nakamura T, Tanizawa Y, Oka Y, Hara K, Kadowaki T, Awata T, Honda M, Yamashita K, Oda N, Yu L, Yamada N, Ogata M, Kamatani N, Iwamoto Y, Del Bosque-Plata L, Hayes MG, Cox NJ, Bell GI 2005 Genetic variants in the calpain-10 gene and the development of type 2 diabetes in the Japanese population. *J Hum Genet* 50:92–98
  115. Kang ES, Kim HJ, Nam M, Nam CM, Ahn CW, Cha BS, Lee HC 2006 A novel 111/121 diplotype in the Calpain-10 gene is associated with type 2 diabetes. *J Hum Genet* 51:629–633
  116. Tsuchiya T, Schwarz PE, Bosque-Plata LD, Geoffrey Hayes M, Dina C, Froguel P, Wayne Towers G, Fischer S, Temelkova-Kurktschiev T, Rietzsch H, Graessler J, Vcelák J, Palyzová D, Selisko T, Bendlová B, Schulze J, Julius U, Hanefeld M, Weedon MN, Evans JC, Frayling TM, Hattersley AT, Orho-Melander M, Groop L, Malecki MT, Hansen T, Pedersen O, Fingerlin TE, Boehnke M, Hanis CL, Cox NJ, Bell GI 2006 Association of the calpain-10 gene with type 2 diabetes in Europeans: results of pooled and meta-analyses. *Mol Genet Metab* 89:174–184
  117. Jensen DP, Urhammer SA, Eiberg H, Borch-Johnsen K, Jørgensen T, Hansen T, Pedersen O 2006 Variation in CAPN10 in relation to type 2 diabetes, obesity and quantitative metabolic traits: studies in 6018 whites. *Mol Genet Metab* 89:360–367
  118. Kifagi C, Makni K, Mnif F, Boudawara M, Hamza N, Rekek N, Abid M, Rebaï A, Granier C, Jarraya F, Ayadi H 2008 Association of calpain-10 polymorphisms with type 2 diabetes in the Tunisian population. *Diabetes Metab* 34:273–278
  119. Abate N, Chandalia M, Satija P, Adams-Huet B, Grundy SM, Sandeep S, Radha V, Deepa R, Mohan V 2005 ENPP1/PC-1 K121Q polymorphism and genetic susceptibility to type 2 diabetes. *Diabetes* 54:1207–1213
  120. Bacci S, Ludovico O, Prudente S, Zhang YY, Di Paola R, Mangiacotti D, Rauseo A, Nolan D, Duffy J, Fini G, Salvemini L, Amico C, Vigna C, Pellegrini F, Menzaghi C, Doria A, Trischitta V 2005 The K121Q polymorphism of the ENPP1/PC-1 gene is associated with insulin resistance/atherogenic phenotypes, including earlier onset of type 2 diabetes and myocardial infarction. *Diabetes* 54:3021–3025
  121. Grarup N, Urhammer SA, Ek J, Albrechtsen A, Glümer C, Borch-Johnsen K, Jørgensen T, Hansen T, Pedersen O 2006 Studies of the relationship between the ENPP1 K121Q polymorphism and type 2 diabetes, insulin resistance and obesity in 7,333 Danish white subjects. *Diabetologia* 49:2097–2104
  122. Bochenski J, Placha G, Wanic K, Malecki M, Sieradzki J, Warram JH, Krolewski AS 2006 New polymorphism of ENPP1 (PC-1) is associated with increased risk of type 2 diabetes among obese individuals. *Diabetes* 55:2626–2630
  123. Meyre D, Bouatia-Naji N, Vatin V, Veslot J, Samson C, Tichet J, Marre M, Balkau B, Froguel P 2007 ENPP1 K121Q polymorphism and obesity, hyperglycaemia and type 2 diabetes in the prospective DESIR Study. *Diabetologia* 50:2090–2096
  124. McAteer JB, Prudente S, Bacci S, Lyon HN, Hirschhorn JN, Trischitta V, Florez JC 2008 The ENPP1 K121Q polymorphism is associated with type 2 diabetes in European populations: evidence from an updated meta-analysis in 42,042 subjects. *Diabetes* 57:1125–1130
  125. Cauchi S, Neale KT, Choquet H, Horber F, Potoczna N, Balkau B, Marre M, Charpentier G, Froguel P, Meyre D 2008 The genetic susceptibility to type 2 diabetes may be modulated by obesity status: implications for association studies. *BMC Med Genet* 9:45
  126. Bouhaha R, Meyre D, Kamoun HA, Ennafa H, Vaillant E, Sassi R, Baroudi T, Vatin V, Froguel P, Elgaaied A, Vaxillaire M 2008 Effect of ENPP1/PC-1-K121Q and PPAR $\gamma$ -Pro12A1a polymorphisms on the genetic susceptibility to T2D in the Tunisian population. *Diabetes Res Clin Pract* 81:278–283
  127. Moore AF, Jablonski KA, Mason CC, McAteer JB, Arakaki RF, Goldstein BJ, Kahn SE, Kitabchi AE, Hanson RL, Knowler WC, Florez JC 2009 The association of ENPP1 K121Q with diabetes incidence is abolished by lifestyle modification in the diabetes prevention program. *J Clin Endocrinol Metab* 94:449–455
  128. Grant SF, Thorleifsson G, Reynisdottir I, Benediktsson R, Manolescu A, Sainz J, Helgason A, Stefansson H, Emilsson V, Helgadóttir A, Styrkarsdóttir U, Magnusson KP, Walters GB, Palsdóttir E, Jonsdóttir T, Gudmundsdóttir T, Gylfason A, Saemundsdóttir J, Wilensky RL, Reilly MP, Rader DJ, Bagger Y, Christiansen C, Gudnason V, Sigurdsson G, Thorsteinsdóttir U, Gulcher JR, Kong A, Stefansson K 2006 Variant of transcription factor 7-like 2 (TCF7L2) gene confers risk of type 2 diabetes. *Nat Genet* 38:320–323
  129. Florez JC, Jablonski KA, Bayley N, Pollin TI, de Bakker PI, Shuldiner AR, Knowler WC, Nathan DM, Altshuler D 2006 TCF7L2 polymorphisms and progression to diabetes in the Diabetes Prevention Program. *N Engl J Med* 355:241–250
  130. Groves CJ, Zeggini E, Minton J, Frayling TM, Weedon MN, Rayner NW, Hitman GA, Walker M, Wiltshire S, Hattersley AT, McCarthy MI 2006 Association analysis of 6,736 U.K. subjects provides replication and confirms TCF7L2 as a type 2 diabetes susceptibility gene with a substantial effect on individual risk. *Diabetes* 55:2640–2644
  131. Zhang C, Qi L, Hunter DJ, Meigs JB, Manson JE, van Dam RM, Hu FB 2006 Variant of transcription factor 7-like 2 (TCF7L2) gene and the risk of type 2 diabetes in large cohorts of U.S. women and men. *Diabetes* 55:2645–2648
  132. Scott LJ, Bonnycastle LL, Willer CJ, Sprau AG, Jackson AU, Narisu N, Duren WL, Chines PS, Stringham HM, Erdos MR, Valle TT, Tuomilehto J, Bergman RN, Mohlke KL, Collins FS, Boehnke M 2006 Association of transcription factor 7-like 2 (TCF7L2) variants with type 2 diabetes in a Finnish sample. *Diabetes* 55:2649–2653
  133. Damcott CM, Pollin TI, Reinhart LJ, Ott SH, Shen H,

- Silver KD, Mitchell BD, Shuldiner AR 2006 Polymorphisms in the transcription factor 7-like 2 (TCF7L2) gene are associated with type 2 diabetes in the Amish: replication and evidence for a role in both insulin secretion and insulin resistance. *Diabetes* 55:2654–2659
134. Saxena R, Gianniny L, Burt NP, Lyssenko V, Giuducci C, Sjögren M, Florez JC, Almgren P, Isomaa B, Orholm-Melander M, Lindblad U, Daly MJ, Tuomi T, Hirschhorn JN, Ardlie KG, Groop LC, Altshuler D 2006 Common single nucleotide polymorphisms in TCF7L2 are reproducibly associated with type 2 diabetes and reduce the insulin response to glucose in nondiabetic individuals. *Diabetes* 55:2890–2895
  135. Cauchi S, Meyre D, Dina C, Choquet H, Samson C, Gallina S, Balkau B, Charpentier G, Pattou F, Stetsyuk V, Scharfmann R, Staels B, Frühbeck G, Froguel P 2006 Transcription factor TCF7L2 genetic study in the French population: expression in human  $\beta$ -cells and adipose tissue and strong association with type 2 diabetes. *Diabetes* 55:2903–2908
  136. van Vliet-Ostapchouk JV, Shiri-Sverdlov R, Zhernakova A, Strengman E, van Haeften TW, Hofker MH, Wijmenga C 2007 Association of variants of transcription factor 7-like 2 (TCF7L2) with susceptibility to type 2 diabetes in the Dutch Breda cohort. *Diabetologia* 50:59–62
  137. Humphries SE, Gable D, Cooper JA, Ireland H, Stephens JW, Hurel SJ, Li KW, Palmen J, Miller MA, Cappuccio FP, Elkeles R, Godsland I, Miller GJ, Talmud PJ 2006 Common variants in the TCF7L2 gene and predisposition to type 2 diabetes in UK European Whites, Indian Asians and Afro-Caribbean men and women. *J Mol Med* 84:1005–1014
  138. Cauchi S, Meyre D, Choquet H, Dina C, Born C, Marre M, Balkau B, Froguel P 2006 TCF7L2 variation predicts hyperglycemia incidence in a French general population: the data from an epidemiological study on the Insulin Resistance Syndrome (DESIR) study. *Diabetes* 55:3189–3192
  139. Chandak GR, Janipalli CS, Bhaskar S, Kulkarni SR, Mohankrishna P, Hattersley AT, Frayling TM, Yajnik CS 2007 Common variants in the TCF7L2 gene are strongly associated with type 2 diabetes mellitus in the Indian population. *Diabetologia* 50:63–67
  140. Marzi C, Huth C, Kolz M, Grallert H, Meisinger C, Wichmann HE, Rathmann W, Herder C, Illig T 2007 Variants of the transcription factor 7-like 2 gene (TCF7L2) are strongly associated with type 2 diabetes but not with the metabolic syndrome in the MONICA/KORA surveys. *Horm Metab Res* 39:46–52
  141. Mayans S, Lackovic K, Lindgren P, Ruikka K, Agren A, Eliasson M, Holmberg D 2007 TCF7L2 polymorphisms are associated with type 2 diabetes in northern Sweden. *Eur J Hum Genet* 15:342–346
  142. Horikoshi M, Hara K, Ito C, Nagai R, Froguel P, Kadowaki T 2007 A genetic variation of the transcription factor 7-like 2 gene is associated with risk of type 2 diabetes in the Japanese population. *Diabetologia* 50:747–751
  143. Lehman DM, Hunt KJ, Leach RJ, Hamlington J, Arya R, Abboud HE, Duggirala R, Blangero J, Göring HH, Stern MP 2007 Haplotypes of transcription factor 7-like 2 (TCF7L2) gene and its upstream region are associated with type 2 diabetes and age of onset in Mexican Americans. *Diabetes* 56:389–393
  144. Sladek R, Rocheleau G, Rung J, Dina C, Shen L, Serre D, Boutin P, Vincent D, Belisle A, Hadjadj S, Balkau B, Heude B, Charpentier G, Hudson TJ, Montpetit A, Pshezhetsky AV, Prentki M, Posner BI, Balding DJ, Meyre D, Polychronakos C, Froguel P 2007 A genome-wide association study identifies novel risk loci for type 2 diabetes. *Nature* 445:881–885
  145. Hayashi T, Iwamoto Y, Kaku K, Hirose H, Maeda S 2007 Replication study for the association of TCF7L2 with susceptibility to type 2 diabetes in a Japanese population. *Diabetologia* 50:980–984
  146. Kimber CH, Doney AS, Pearson ER, McCarthy MI, Hattersley AT, Leese GP, Morris AD, Palmer CN 2007 TCF7L2 in the Go-DARTS study: evidence for a gene dose effect on both diabetes susceptibility and control of glucose levels. *Diabetologia* 50:1186–1191
  147. Wang J, Kuusisto J, Vanttinen M, Kuulasmaa T, Lindström J, Tuomilehto J, Uusitupa M, Laakso M 2007 Variants of transcription factor 7-like 2 (TCF7L2) gene predict conversion to type 2 diabetes in the Finnish Diabetes Prevention Study and are associated with impaired glucose regulation and impaired insulin secretion. *Diabetologia* 50:1192–1200
  148. Parra EJ, Cameron E, Simmonds L, Valladares A, McKeigue P, Shriver M, Wacher N, Kumate J, Kittles R, Cruz M 2007 Association of TCF7L2 polymorphisms with type 2 diabetes in Mexico City. *Clin Genet* 71:359–366
  149. Cauchi S, El Achhab Y, Choquet H, Dina C, Krempler F, Weitgasser R, Nejari C, Patsch W, Chikri M, Meyre D, Froguel P 2007 TCF7L2 is reproducibly associated with type 2 diabetes in various ethnic groups: a global meta-analysis. *J Mol Med* 85:777–782
  150. Chang YC, Chang TJ, Jiang YD, Kuo SS, Lee KC, Chiu KC, Chuang LM 2007 Association study of the genetic polymorphisms of the transcription factor 7-like 2 (TCF7L2) gene and type 2 diabetes in the Chinese population. *Diabetes* 56:2631–2637
  151. Elbein SC, Chu WS, Das SK, Yao-Borengasser A, Hasstedt SJ, Wang H, Rasouli N, Kern PA 2007 Transcription factor 7-like 2 polymorphisms and type 2 diabetes, glucose homeostasis traits and gene expression in US participants of European and African descent. *Diabetologia* 50:1621–1630
  152. Ng MC, Tam CH, Lam VK, So WY, Ma RC, Chan JC 2007 Replication and identification of novel variants at TCF7L2 associated with type 2 diabetes in Hong Kong Chinese. *J Clin Endocrinol Metab* 92:3733–3737
  153. Dahlgren A, Zethelius B, Jensevik K, Syvänen AC, Berne C 2007 Variants of the TCF7L2 gene are associated with  $\beta$  cell dysfunction and confer an increased risk of type 2 diabetes mellitus in the ULSAM cohort of Swedish elderly men. *Diabetologia* 50:1852–1857
  154. Bodhini D, Radha V, Dhar M, Narayani N, Mohan V 2007 The rs12255372(G/T) and rs7903146(C/T) polymorphisms of the TCF7L2 gene are associated with type 2 diabetes mellitus in Asian Indians. *Metabolism* 56:1174–1178
  155. Miyake K, Horikawa Y, Hara K, Yasuda K, Osawa H, Furuta H, Hirota Y, Yamagata K, Hinokio Y, Oka Y, Iwasaki N, Iwamoto Y, Yamada Y, Seino Y, Maegawa H, Kashiwagi A, Yamamoto K, Tokunaga K, Takeda J, Makino H, Nanjo K, Kadowaki T, Kasuga M 2008 Association of TCF7L2 polymorphisms with susceptibility to type 2 diabetes in 4,087 Japanese subjects. *J Hum Genet* 53:174–180



156. Rees SD, Bellary S, Britten AC, O'Hare JP, Kumar S, Barnett AH, Kelly MA 2008 Common variants of the TCF7L2 gene are associated with increased risk of type 2 diabetes mellitus in a UK-resident South Asian population. *BMC Med Genet* 9:8
157. Sanghera DK, Nath SK, Ortega L, Gambarelli M, Kim-Howard X, Singh JR, Ralhan SK, Wander GS, Mehra NK, Mulvihill JJ, Kamboh MI 2008 TCF7L2 polymorphisms are associated with type 2 diabetes in Khatri Sikhs from North India: genetic variation affects lipid levels. *Ann Hum Genet* 72:499–509
158. González-Sánchez JL, Martínez-Larrad MT, Zabena C, Pérez-Barba M, Serrano-Ríos M 2008 Association of variants of the TCF7L2 gene with increases in the risk of type 2 diabetes and the proinsulin:insulin ratio in the Spanish population. *Diabetologia* 51:1993–1997
159. Yan Y, North KE, Ballantyne CM, Brancati FL, Chambless LE, Franceschini N, Heiss G, Kottgen A, Pankow JS, Selvin E, West SL, Boerwinkle E 2009 Transcription factor 7-like 2 (TCF7L2) polymorphism and context-specific risk of type 2 diabetes in African American and Caucasian adults: the Atherosclerosis Risk in Communities Study. *Diabetes* 58:285–289
160. Thorsby PM, Midthjell K, Gjerlaugsen N, Holmen J, Hanssen KF, Birkeland KI, Berg JP 2009 Comparison of genetic risk in three candidate genes (TCF7L2, PPARG, KCNJ11) with traditional risk factors for type 2 diabetes in a population-based study—the HUNT study. *Scand J Clin Lab Invest* 69:282–287
161. Tabara Y, Osawa H, Kawamoto R, Onuma H, Shimizu I, Miki T, Kohara K, Makino H 2009 Replication study of candidate genes associated with type 2 diabetes based on genome-wide screening. *Diabetes* 58:493–498
162. Hertel JK, Johansson S, Raeder H, Midthjell K, Lyssenko V, Groop L, Molven A, Njølstad PR 2008 Genetic analysis of recently identified type 2 diabetes loci in 1,638 unsampled patients with type 2 diabetes and 1,858 control participants from a Norwegian population-based cohort (the HUNT study). *Diabetologia* 51:971–977
163. Ng MC, Park KS, Oh B, Tam CH, Cho YM, Shin HD, Lam VK, Ma RC, So WY, Cho YS, Kim HL, Lee HK, Chan JC, Cho NH 2008 Implication of genetic variants near TCF7L2, SLC30A8, HHEX, CDKAL1, CDKN2A/B, IGF2BP2, and FTO in type 2 diabetes and obesity in 6,719 Asians. *Diabetes* 57:2226–2233
164. Horikawa Y, Miyake K, Yasuda K, Enya M, Hirota Y, Yamagata K, Hinokio Y, Oka Y, Iwasaki N, Iwamoto Y, Yamada Y, Seino Y, Maegawa H, Kashiwagi A, Yamamoto K, Tokunaga K, Takeda J, Kasuga M 2008 Replication of genome-wide association studies of type 2 diabetes susceptibility in Japan. *J Clin Endocrinol Metab* 93:3136–3141
165. Xiang J, Li XY, Xu M, Hong J, Huang Y, Tan JR, Lu X, Dai M, Yu B, Ning G 2008 Zinc transporter-8 gene (SLC30A8) is associated with type 2 diabetes in Chinese. *J Clin Endocrinol Metab* 93:4107–4112
166. Wu Y, Li H, Loos RJ, Yu Z, Ye X, Chen L, Pan A, Hu FB, Lin X 2008 Common variants in CDKAL1, CDKN2A/B, IGF2BP2, SLC30A8, and HHEX/IDE genes are associated with type 2 diabetes and impaired fasting glucose in a Chinese Han population. *Diabetes* 57:2834–2842
167. Grarup N, Rose CS, Andersson EA, Andersen G, Nielsen AL, Albrechtsen A, Clausen JO, Rasmussen SS, Jørgensen T, Sandbaek A, Lauritzen T, Schmitz O, Hansen T, Pedersen O 2007 Studies of association of variants near the HHEX, CDKN2A/B, and IGF2BP2 genes with type 2 diabetes and impaired insulin release in 10,705 Danish subjects: validation and extension of genome-wide association studies. *Diabetes* 56:3105–3111
168. Schulze MB, Al-Hasani H, Boeing H, Fisher E, Döring F, Joost HG 2007 Variation in the HHEX-IDE gene region predisposes to type 2 diabetes in the prospective, population-based EPIC-Potsdam cohort. *Diabetologia* 50:2405–2407
169. Horikoshi M, Hara K, Ito C, Shojima N, Nagai R, Ueki K, Froguel P, Kadowaki T 2007 Variations in the HHEX gene are associated with increased risk of type 2 diabetes in the Japanese population. *Diabetologia* 50:2461–2466
170. Furukawa Y, Shimada T, Furuta H, Matsuno S, Kusuyama A, Doi A, Nishi M, Sasaki H, Sanke T, Nanjo K 2008 Polymorphisms in the IDE-KIF11-HHEX gene locus are reproducibly associated with type 2 diabetes in a Japanese population. *J Clin Endocrinol Metab* 93:310–314
171. van Vliet-Ostaptchouk JV, Onland-Moret NC, van Haefen TW, Franke L, Elbers CC, Shiri-Sverdlow R, van der Schouw YT, Hofker MH, Wijmenga C 2008 HHEX gene polymorphisms are associated with type 2 diabetes in the Dutch Breda cohort. *Eur J Hum Genet* 16:652–656
172. Frayling TM, Timpson NJ, Weedon MN, Zeggini E, Freathy RM, Lindgren CM, Perry JR, Elliott KS, Lango H, Rayner NW, Shields B, Harries LW, Barrett JC, Ellard S, Groves CJ, Knight B, Patch AM, Ness AR, Ebrahim S, Lawlor DA, Ring SM, Ben-Shlomo Y, Jarvelin MR, Sovio U, Bennett AJ, Melzer D, Ferrucci L, Loos RJ, Barroso I, Wareham NJ, Karpe F, Owen KR, Cardon LR, Walker M, Hitman GA, Palmer CN, Doney AS, Morris AD, Smith GD, Hattersley AT, McCarthy MI 2007 A common variant in the FTO gene is associated with body mass index and predisposes to childhood and adult obesity. *Science* 316:889–894
173. Tan JT, Dorajoo R, Seielstad M, Sim XL, Ong RT, Chia KS, Wong TY, Saw SM, Chew SK, Aung T, Tai ES 2008 FTO variants are associated with obesity in the Chinese and Malay populations in Singapore. *Diabetes* 57:2851–2857
174. Steinthorsdottir V, Thorleifsson G, Reynisdottir I, Benediktsson R, Jonsdottir T, Walters GB, Styrkarsdottir U, Gretarsdottir S, Emilsson V, Ghosh S, Baker A, Snorrardottir S, Bjarnason H, Ng MC, Hansen T, Bagger Y, Wilensky RL, Reilly MP, Adeyemo A, Chen Y, Zhou J, Gudnason V, Chen G, Huang H, Lashley K, Doumatey A, So WY, Ma RC, Andersen G, Borch-Johnsen K, Jorgensen T, van Vliet-Ostaptchouk JV, Hofker MH, Wijmenga C, Christiansen C, Rader DJ, Rotimi C, Gurney M, Chan JC, Pedersen O, Sigurdsson G, Gulcher JR, Thorsteinsdottir U, Kong A, Stefansson K 2007 A variant in CDKAL1 influences insulin response and risk of type 2 diabetes. *Nat Genet* 39:770–775
175. Bronstein M, Pisanté A, Yakir B, Darvasi A 2008 Type 2 diabetes susceptibility loci in the Ashkenazi Jewish population. *Hum Genet* 124:101–104
176. Liu Y, Yu L, Zhang D, Chen Z, Zhou DZ, Zhao T, Li S, Wang T, Hu X, Feng GY, Zhang ZF, He L, Xu H 2008 Positive association between variations in CDKAL1 and



- type 2 diabetes in Han Chinese individuals. *Diabetologia* 51:2134–2137
177. Lee YH, Kang ES, Kim SH, Han SJ, Kim CH, Kim HJ, Ahn CW, Cha BS, Nam M, Nam CM, Lee HC 2008 Association between polymorphisms in SLC30A8, HHEX, CDKN2A/B, IGF2BP2, FTO, WFS1, CDKAL1, KCNQ1 and type 2 diabetes in the Korean population. *J Hum Genet* 53:991–998
  178. Duesing K, Fatemifar G, Charpentier G, Marre M, Tichet J, Hercberg S, Balkau B, Froguel P, Gibson F 2008 Strong association of common variants in the CDKN2A/CDKN2B region with type 2 diabetes in French Europeans. *Diabetologia* 51:821–826
  179. Unoki H, Takahashi A, Kawaguchi T, Hara K, Horikoshi M, Andersen G, Ng DP, Holmkvist J, Borch-Johnsen K, Jørgensen T, Sandbaek A, Lauritzen T, Hansen T, Nurbaya S, Tsunoda T, Kubo M, Babazono T, Hirose H, Hayashi M, Iwamoto Y, Kashiwagi A, Kaku K, Kawamori R, Tai ES, Pedersen O, Kamatani N, Kadowaki T, Kikkawa R, Nakamura Y, Maeda S 2008 SNPs in KCNQ1 are associated with susceptibility to type 2 diabetes in East Asian and European populations. *Nat Genet* 40:1098–1102
  180. Yasuda K, Miyake K, Horikawa Y, Hara K, Osawa H, Furuta H, Hirota Y, Mori H, Jonsson A, Sato Y, Yamagata K, Hinokio Y, Wang HY, Tanahashi T, Nakamura N, Oka Y, Iwasaki N, Iwamoto Y, Yamada Y, Seino Y, Maegawa H, Kashiwagi A, Takeda J, Maeda E, Shin HD, Cho YM, Park KS, Lee HK, Ng MC, Ma RC, So WY, Chan JC, Lyssenko V, Tuomi T, Nilsson P, Groop L, Kamatani N, Sekine A, Nakamura Y, Yamamoto K, Yoshida T, Tokunaga K, Itakura M, Makino H, Nanjo K, Kadowaki T, Kasuga M 2008 Variants in KCNQ1 are associated with susceptibility to type 2 diabetes mellitus. *Nat Genet* 40:1092–1097
  181. Prokopenko I, Langenberg C, Florez JC, Saxena R, Soranzo N, Thorleifsson G, Loos RJ, Manning AK, Jackson AU, Aulchenko Y, Potter SC, Erdos MR, Sanna S, Hottenga JJ, Wheeler E, Kaakinen M, Lyssenko V, Chen WM, Ahmadi K, Beckmann JS, Bergman RN, Bochud M, Bonnycastle LL, Buchanan TA, Cao A, Cervino A, Coin L, Collins FS, Crisponi L, de Geus EJ, Dehghan A, Deloukas P, Doney AS, Elliott P, Freimer N, Gateva V, et al. 2009 Variants in MTNR1B influence fasting glucose levels. *Nat Genet* 41:77–81
  182. Lyssenko V, Nagorny CL, Erdos MR, Wierup N, Jonsson A, Spégel P, Bugliani M, Saxena R, Fex M, Pulizzi N, Isomaa B, Tuomi T, Nilsson P, Kuusisto J, Tuomilehto J, Boehnke M, Altshuler D, Sundler F, Eriksson JG, Jackson AU, Laakso M, Marchetti P, Watanabe RM, Mulder H, Groop L 2009 Common variant in MTNR1B associated with increased risk of type 2 diabetes and impaired early insulin secretion. *Nat Genet* 41:82–88
  183. Bouatia-Naji N, Bonnefond A, Cavalcanti-Proença C, Sparso T, Holmkvist J, Marchand M, Delplanque J, Lobbens S, Rocheleau G, Durand E, De Graeve F, Chèvre JC, Borch-Johnsen K, Hartikainen AL, Ruokonen A, Tichet J, Marre M, Weill J, Heude B, Tauber M, Lemaire K, Schuit F, Elliott P, Jørgensen T, Charpentier G, Hadjadj S, Cauchi S, Vaxillaire M, Sladek R, Visvikis-Siest S, Balkau B, Lévy-Marchal C, Pattou F, Meyre D, Blakemore AI, Jarvelin MR, Walley AJ, Hansen T, Dina C, Pedersen O, Froguel P 2009 A variant near MTNR1B is associated with increased fasting plasma glucose levels and type 2 diabetes risk. *Nat Genet* 41:89–94
  184. Straub SG, Sharp GW 2002 Glucose-stimulated signaling pathways in biphasic insulin secretion. *Diabetes Metab Res Rev* 18:451–463
  185. Doyle ME, Egan JM 2007 Mechanisms of action of glucagon-like peptide 1 in the pancreas. *Pharmacol Ther* 113:546–593
  186. Stumvoll M, Fritsche A, Haring HU 2002 Clinical characterization of insulin secretion as the basis for genetic analyses. *Diabetes* 51(Suppl 1):S122–S129
  187. Poulsen P, Levin K, Petersen I, Christensen K, Beck-Nielsen H, Vaag A 2005 Heritability of insulin secretion, peripheral and hepatic insulin action, and intracellular glucose partitioning in young and old Danish twins. *Diabetes* 54:275–283
  188. Lynn S, Evans JC, White C, Frayling TM, Hattersley AT, Turnbull DM, Horikawa Y, Cox NJ, Bell GI, Walker M 2002 Variation in the calpain-10 gene affects blood glucose levels in the British population. *Diabetes* 51:247–250
  189. Grarup N, Andersen G, Krarup NT, Albrechtsen A, Schmitz O, Jørgensen T, Borch-Johnsen K, Hansen T, Pedersen O 2008 Association testing of novel type 2 diabetes risk-alleles in the JAZF1, CDC123/CAMK1D, TSPAN8, THADA, ADAMTS9, and NOTCH2 loci with insulin release, insulin sensitivity and obesity in a population-based sample of 4,516 glucose-tolerant middle-aged Danes. *Diabetes* 57:2534–2540
  190. Pascoe L, Tura A, Patel SK, Ibrahim IM, Ferrannini E, Zeggini E, Weedon MN, Mari A, Hattersley AT, McCarthy MI, Frayling TM, Walker M 2007 Common variants of the novel type 2 diabetes genes, CDKAL1 and HHEX/IDE, are associated with decreased pancreatic  $\beta$ -cell function. *Diabetes* 56:3101–3104
  191. Palmer ND, Goodarzi MO, Langefeld CD, Ziegler J, Norris JM, Haffner SM, Bryer-Ash M, Bergman RN, Wagenknecht LE, Taylor KD, Rotter JI, Bowden DW 2008 Quantitative trait analysis of type 2 diabetes susceptibility loci identified from whole genome association studies in the Insulin Resistance Atherosclerosis Family Study. *Diabetes* 57:1093–1100
  192. Stancáková A, Pihlajamäki J, Kuusisto J, Stefan N, Fritsche A, Häring H, Andreozzi F, Succurro E, Sesti G, Boesgaard TW, Hansen T, Pedersen O, Jansson PA, Hammarstedt A, Smith U, Laakso M 2008 SNP rs7754840 of CDKAL1 is associated with impaired insulin secretion in non-diabetic offspring of type 2 diabetic subjects (the EUGENE2 study) and in a large sample of men with normal glucose tolerance. *J Clin Endocrinol Metab* 93:1924–1930
  193. Ruchat SM, Elks CE, Loos RJ, Vohl MC, Weisnagel SJ, Rankinen T, Bouchard C, Pérusse L 2009 Association between insulin secretion, insulin sensitivity and type 2 diabetes susceptibility variants identified in genome-wide association studies. *Acta Diabetol* 46:217–226
  194. Baratta R, Rossetti P, Prudente S, Barbetti F, Sudano D, Nigro A, Farina MG, Pellegrini F, Trischitta V, Frittitta L 2008 Role of the ENPP1 K121Q polymorphism in glucose homeostasis. *Diabetes* 57:3360–3364
  195. Staiger H, Machicao F, Stefan N, Tschritter O, Thamer C, Kantartzis K, Schäfer SA, Kirchoff K, Fritsche A, Häring HU 2007 Polymorphisms within novel risk loci for type 2 diabetes determine  $\beta$ -cell function. *PLoS ONE* 2:e832
  196. Pivovarova O, Nikiforova VJ, Pfeiffer AF, Rudovich N 2009 The influence of genetic variations in HHEX gene on

- insulin metabolism in the German MESYBEPO cohort. *Diabetes Metab Res Rev* 25:156–162
197. Müssig K, Staiger H, Machicao F, Kirchoff K, Guthoff M, Schäfer SA, Kantartzis K, Silbernagel G, Stefan N, Holst JJ, Gallwitz B, Häring HU, Fritsche A 2009 Association of type 2 diabetes candidate polymorphisms in KCNQ1 with incretin and insulin secretion. *Diabetes* 58:1715–1720
  198. Ling C, Del Guerra S, Lupi R, Rönn T, Granhall C, Luthman H, Masiello P, Marchetti P, Groop L, Del Prato S 2008 Epigenetic regulation of PPARGC1A in human type 2 diabetic islets and effect on insulin secretion. *Diabetologia* 51:615–622
  199. Schäfer SA, Tschritter O, Machicao F, Thamer C, Stefan N, Gallwitz B, Holst JJ, Dekker JM, 't Hart LM, Nijpels G, van Haefen TW, Häring HU, Fritsche A 2007 Impaired glucagon-like peptide-1-induced insulin secretion in carriers of transcription factor 7-like 2 (TCF7L2) gene polymorphisms. *Diabetologia* 50:2443–2450
  200. Lyssenko V, Lupi R, Marchetti P, Del Guerra S, Orholm-Melander M, Almgren P, Sjögren M, Ling C, Eriksson KF, Lethagen AL, Mancarella R, Berglund G, Tuomi T, Nilsson P, Del Prato S, Groop L 2007 Mechanisms by which common variants in the TCF7L2 gene increase risk of type 2 diabetes. *J Clin Invest* 117:2155–2163
  201. Florez JC, Jablonski KA, McAteer J, Sandhu MS, Wareham NJ, Barroso I, Franks PW, Altshuler D, Knowler WC 2008 Testing of diabetes-associated WFS1 polymorphisms in the Diabetes Prevention Program. *Diabetologia* 51:451–457
  202. Sparso T, Andersen G, Albrechtsen A, Jørgensen T, Borch-Johnsen K, Sandbaek A, Lauritzen T, Wasson J, Permutt MA, Glaser B, Madsbad S, Pedersen O, Hansen T 2008 Impact of polymorphisms in WFS1 on prediabetic phenotypes in a population-based sample of middle-aged people with normal and abnormal glucose regulation. *Diabetologia* 51:1646–1652
  203. Schäfer SA, Müssig K, Staiger H, Machicao F, Stefan N, Gallwitz B, Häring HU, Fritsche A 2009 Common genetic variation in WFS1 predicts impaired glucagon-like peptide-1-induced insulin secretion. *Diabetologia* 52:1075–1082
  204. Schwanstecher C, Meyer U, Schwanstecher M 2002 K(IR)6.2 polymorphism predisposes to type 2 diabetes by inducing overactivity of pancreatic  $\beta$ -cell ATP-sensitive K(+) channels. *Diabetes* 51:875–879
  205. Schwanstecher C, Neugebauer B, Schulz M, Schwanstecher M 2002 The common single nucleotide polymorphism E23K in K(IR)6.2 sensitizes pancreatic  $\beta$ -cell ATP-sensitive potassium channels toward activation through nucleoside diphosphates. *Diabetes* 51(Suppl 3):S363–S367
  206. Riedel MJ, Boora P, Steckley D, de Vries G, Light PE 2003 Kir6.2 polymorphisms sensitize  $\beta$ -cell ATP-sensitive potassium channels to activation by acyl CoAs: a possible cellular mechanism for increased susceptibility to type 2 diabetes? *Diabetes* 52:2630–2635
  207. Gross DN, van den Heuvel AP, Birnbaum MJ 2008 The role of FoxO in the regulation of metabolism. *Oncogene* 27:2320–2336
  208. Nakae J, Biggs 3rd WH, Kitamura T, Cavenee WK, Wright CV, Arden KC, Accili D 2002 Regulation of insulin action and pancreatic  $\beta$ -cell function by mutated alleles of the gene encoding forkhead transcription factor Foxo1. *Nat Genet* 32:245–253
  209. Kitamura T, Nakae J, Kitamura Y, Kido Y, Biggs 3rd WH, Wright CV, White MF, Arden KC, Accili D 2002 The forkhead transcription factor Foxo1 links insulin signaling to Pdx1 regulation of pancreatic  $\beta$  cell growth. *J Clin Invest* 110:1839–1847
  210. Okamoto H, Hribal ML, Lin HV, Bennett WR, Ward A, Accili D 2006 Role of the forkhead protein FoxO1 in  $\beta$  cell compensation to insulin resistance. *J Clin Invest* 116:775–782
  211. Kodama S, Toyonaga T, Kondo T, Matsumoto K, Tsuruzoe K, Kawashima J, Goto H, Kume K, Kume S, Sakakida M, Araki E 2005 Enhanced expression of PDX-1 and Ngn3 by exendin-4 during  $\beta$  cell regeneration in STZ-treated mice. *Biochem Biophys Res Commun* 327:1170–1178
  212. Buteau J, Spatz ML, Accili D 2006 Transcription factor FoxO1 mediates glucagon-like peptide-1 effects on pancreatic  $\beta$ -cell mass. *Diabetes* 55:1190–1196
  213. Takamoto I, Terauchi Y, Kubota N, Ohsugi M, Ueki K, Kadowaki T 2008 Crucial role of insulin receptor substrate-2 in compensatory  $\beta$ -cell hyperplasia in response to high fat diet-induced insulin resistance. *Diabetes Obes Metab* 10(Suppl 4):147–156
  214. Kaneto H, Miyatsuka T, Shiraiwa T, Yamamoto K, Kato K, Fujitani Y, Matsuoka TA 2007 Crucial role of PDX-1 in pancreas development,  $\beta$ -cell differentiation, and induction of surrogate  $\beta$ -cells. *Curr Med Chem* 14:1745–1752
  215. Waldegger S, Barth P, Raber G, Lang F 1997 Cloning and characterization of a putative human serine/threonine protein kinase transcriptionally modified during anisotonic and isotonic alterations of cell volume. *Proc Natl Acad Sci USA* 94:4440–4445
  216. Dieter M, Palmada M, Rajamanickam J, Aydin A, Busjahn A, Boehmer C, Luft FC, Lang F 2004 Regulation of glucose transporter SGLT1 by ubiquitin ligase Nedd4–2 and kinases SGK1, SGK3, and PKB. *Obes Res* 12:862–870
  217. Grahmmer F, Henke G, Sandu C, Rexhepaj R, Hussain A, Friedrich B, Risler T, Metzger M, Just L, Skutella T, Wulff P, Kuhl D, Lang F 2006 Intestinal function of gene-targeted mice lacking serum- and glucocorticoid-inducible kinase 1. *Am J Physiol Gastrointest Liver Physiol* 290:G1114–G1123
  218. Palmada M, Boehmer C, Akel A, Rajamanickam J, Jeyaraj S, Keller K, Lang F 2006 SGK1 kinase upregulates GLUT1 activity and plasma membrane expression. *Diabetes* 55:421–427
  219. Jeyaraj S, Boehmer C, Lang F, Palmada M 2007 Role of SGK1 kinase in regulating glucose transport via glucose transporter GLUT4. *Biochem Biophys Res Commun* 356:629–635
  220. Lang F, Böhmer C, Palmada M, Seebohm G, Strutz-Seebohm N, Vallon V 2006 (Patho)physiological significance of the serum- and glucocorticoid-inducible kinase isoforms. *Physiol Rev* 86:1151–1178
  221. Ullrich S, Berchtold S, Ranta F, Seebohm G, Henke G, Lupescu A, Mack AF, Chao CM, Su J, Nitschke R, Alexander D, Friedrich B, Wulff P, Kuhl D, Lang F 2005 Serum- and glucocorticoid-inducible kinase 1 (SGK1) mediates glucocorticoid-induced inhibition of insulin secretion. *Diabetes* 54:1090–1099
  222. Ullrich S, Zhang Y, Avram D, Ranta F, Kuhl D, Häring HU, Lang F 2007 Dexamethasone increases Na<sup>+</sup>/K<sup>+</sup> AT-

- Pase activity in insulin secreting cells through SGK1. *Biochem Biophys Res Commun* 352:662–667
223. Stumvoll M, Fritsche A, Madaus A, Stefan N, Weisser M, Machicao F, Häring H 2001 Functional significance of the UCSNP-43 polymorphism in the CAPN10 gene for proinsulin processing and insulin secretion in nondiabetic Germans. *Diabetes* 50:2161–2163
  224. Groenewoud MJ, Dekker JM, Fritsche A, Reiling E, Nijpels G, Heine RJ, Maassen JA, Machicao F, Schäfer SA, Häring HU, 't Hart LM, van Haeften TW 2008 Variants of CDKAL1 and IGF2BP2 affect first-phase insulin secretion during hyperglycaemic clamps. *Diabetologia* 51:1659–1663
  225. Staiger H, Stancáková A, Zilinskaite J, Vänttinen M, Hansen T, Marini MA, Hammarstedt A, Jansson PA, Sesti G, Smith U, Pedersen O, Laakso M, Stefan N, Fritsche A, Häring HU 2008 A candidate type 2 diabetes polymorphism near the HHEX locus affects acute glucose-stimulated insulin release in European populations: results from the EUGENE2 study. *Diabetes* 57:514–517
  226. Staiger H, Machicao F, Schäfer SA, Kirchhoff K, Kantartzis K, Guthoff M, Silbernagel G, Stefan N, Häring HU, Fritsche A 2008 Polymorphisms within the novel type 2 diabetes risk locus MTNR1B determine  $\beta$ -cell function. *PLoS ONE* 3:e3962
  227. Boesgaard TW, Zilinskaite J, Vänttinen M, Laakso M, Jansson PA, Hammarstedt A, Smith U, Stefan N, Fritsche A, Häring H, Hribal M, Sesti G, Zobel DP, Pedersen O, Hansen T 2008 The common SLC30A8 Arg325Trp variant is associated with reduced first-phase insulin release in 846 non-diabetic offspring of type 2 diabetes patients—the EUGENE2 study. *Diabetologia* 51:816–820
  228. Turner MD, Cassell PG, Hitman GA 2005 Calpain-10: from genome search to function. *Diabetes Metab Res Rev* 21:505–514
  229. Marshall C, Hitman GA, Partridge CJ, Clark A, Ma H, Shearer TR, Turner MD 2005 Evidence that an isoform of calpain-10 is a regulator of exocytosis in pancreatic  $\beta$ -cells. *Mol Endocrinol* 19:213–224
  230. Turner MD, Fulcher FK, Jones CV, Smith BT, Aganna E, Partridge CJ, Hitman GA, Clark A, Patel YM 2007 Calpain facilitates actin reorganization during glucose-stimulated insulin secretion. *Biochem Biophys Res Commun* 352:650–655
  231. Bort R, Martinez-Barbera JP, Beddington RS, Zaret KS 2004 Hex homeobox gene-dependent tissue positioning is required for organogenesis of the ventral pancreas. *Development* 131:797–806
  232. Chimienti F, Devergnas S, Favier A, Seve M 2004 Identification and cloning of a  $\beta$ -cell-specific zinc transporter, ZnT-8, localized into insulin secretory granules. *Diabetes* 53:2330–2337
  233. Chimienti F, Devergnas S, Pattou F, Schuit F, Garcia-Cuenca R, Vandewalle B, Kerr-Conte J, Van Lommel L, Grunwald D, Favier A, Seve M 2006 In vivo expression and functional characterization of the zinc transporter ZnT8 in glucose-induced insulin secretion. *J Cell Sci* 119:4199–4206
  234. Scarpulla RC 2008 Transcriptional paradigms in mammalian mitochondrial biogenesis and function. *Physiol Rev* 88:611–638
  235. Mulder H, Ling C 2009 Mitochondrial dysfunction in pancreatic  $\beta$ -cells in type 2 diabetes. *Mol Cell Endocrinol* 297:34–40
  236. Jin T, Liu L 2008 The Wnt signaling pathway effector TCF7L2 and type 2 diabetes mellitus. *Mol Endocrinol* 22:2383–2392
  237. Shu L, Sauter NS, Schulthess FT, Matveyenko AV, Oberholzer J, Maedler K 2008 Transcription factor 7-like 2 regulates  $\beta$ -cell survival and function in human pancreatic islets. *Diabetes* 57:645–653
  238. Loder MK, da Silva Xavier G, McDonald A, Rutter GA 2008 TCF7L2 controls insulin gene expression and insulin secretion in mature pancreatic  $\beta$ -cells. *Biochem Soc Trans* 36:357–359
  239. Shu L, Matveyenko AV, Kerr-Conte J, Cho JH, McIntosh CH, Maedler K 2009 Decreased TCF7L2 protein levels in type 2 diabetes correlate with downregulation of GIP- and GLP1 receptors and impaired  $\beta$ -cell function. *Hum Mol Genet* 18:2388–2399
  240. Ishihara H, Takeda S, Tamura A, Takahashi R, Yamaguchi S, Takei D, Yamada T, Inoue H, Soga H, Katagiri H, Tanizawa Y, Oka Y 2004 Disruption of the WFS1 gene in mice causes progressive  $\beta$ -cell loss and impaired stimulus-secretion coupling in insulin secretion. *Hum Mol Genet* 13:1159–1170
  241. Riggs AC, Bernal-Mizrachi E, Ohsugi M, Wasson J, Fatrai S, Welling C, Murray J, Schmidt RE, Herrera PL, Permutt MA 2005 Mice conditionally lacking the Wolfram gene in pancreatic islet  $\beta$  cells exhibit diabetes as a result of enhanced endoplasmic reticulum stress and apoptosis. *Diabetologia* 48:2313–2321
  242. Yamada T, Ishihara H, Tamura A, Takahashi R, Yamaguchi S, Takei D, Tokita A, Satake C, Tashiro F, Katagiri H, Aburatani H, Miyazaki J, Oka Y 2006 WFS1-deficiency increases endoplasmic reticulum stress, impairs cell cycle progression and triggers the apoptotic pathway specifically in pancreatic  $\beta$ -cells. *Hum Mol Genet* 15:1600–1609
  243. Steiner DF, James DE 1992 Cellular and molecular biology of the  $\beta$  cell. *Diabetologia* 35(Suppl 2):S41–S48
  244. Loos RJ, Franks PW, Francis RW, Barroso I, Gribble FM, Savage DB, Ong KK, O'Rahilly S, Wareham NJ 2007 TCF7L2 polymorphisms modulate proinsulin levels and  $\beta$ -cell function in a British European population. *Diabetes* 56:1943–1947
  245. Kirchhoff K, Machicao F, Haupt A, Schäfer SA, Tschritter O, Staiger H, Stefan N, Häring HU, Fritsche A 2008 Polymorphisms in the TCF7L2, CDKAL1 and SLC30A8 genes are associated with impaired proinsulin conversion. *Diabetologia* 51:597–601
  246. Stoleran ES, Manning AK, McAteer JB, Fox CS, Dupuis J, Meigs JB, Florez JC 2009 TCF7L2 variants are associated with increased proinsulin/insulin ratios but not obesity traits in the Framingham Heart Study. *Diabetologia* 52:614–620
  247. Haupt A, Guthoff M, Schäfer SA, Kirchhoff K, Machicao F, Gallwitz B, Staiger H, Stefan N, Fritsche A, Häring HU 2009 The inhibitory effect of recent type 2 diabetes risk loci on insulin secretion is modulated by insulin sensitivity. *J Clin Endocrinol Metab* 94:1775–1780
  248. Qatanani M, Lazar MA 2007 Mechanisms of obesity-associated insulin resistance: many choices on the menu. *Genes Dev* 21:1443–1455
  249. Østergård T, Jessen N, Schmitz O, Mandarino LJ 2007



- The effect of exercise, training, and inactivity on insulin sensitivity in diabetics and their relatives: what is new? *Appl Physiol Nutr Metab* 32:541–548
250. Stumvoll M, Tschrirter O, Fritsche A, Staiger H, Renn W, Weisser M, Machicao F, Häring H 2002 Association of the T-G polymorphism in adiponectin (exon 2) with obesity and insulin sensitivity: interaction with family history of type 2 diabetes. *Diabetes* 51:37–41
  251. Menzaghi C, Ercolino T, Di Paola R, Berg AH, Warram JH, Scherer PE, Trischitta V, Doria A 2002 A haplotype at the adiponectin locus is associated with obesity and other features of the insulin resistance syndrome. *Diabetes* 51:2306–2312
  252. Filippi E, Sentinelli F, Trischitta V, Romeo S, Arca M, Leonetti F, Di Mario U, Baroni MG 2004 Association of the human adiponectin gene and insulin resistance. *Eur J Hum Genet* 12:199–205
  253. Ukkola O, Santaniemi M, Rankinen T, Leon AS, Skinner JS, Wilmore JH, Rao DC, Bergman R, Kesäniemi YA, Bouchard C 2005 Adiponectin polymorphisms, adiposity and insulin metabolism: HERITAGE family study and Oulu diabetic study. *Ann Med* 37:141–150
  254. Richardson DK, Schneider J, Fourcaudot MJ, Rodriguez LM, Arya R, Dyer TD, Almasy L, Blangero J, Stern MP, Defronzo RA, Duggirala R, Jenkinson CP 2006 Association between variants in the genes for adiponectin and its receptors with insulin resistance syndrome (IRS)-related phenotypes in Mexican Americans. *Diabetologia* 49:2317–2328
  255. Petrone A, Zavarella S, Caiazzo A, Leto G, Spoletini M, Potenziani S, Osborn J, Vania A, Buzzetti R 2006 The promoter region of the adiponectin gene is a determinant in modulating insulin sensitivity in childhood obesity. *Obesity (Silver Spring)* 14:1498–1504
  256. Buzzetti R, Petrone A, Zavarella S, Zampetti S, Spoletini M, Potenziani S, Leto G, Osborn J, Leonetti F 2007 The glucose clamp reveals an association between adiponectin gene polymorphisms and insulin sensitivity in obese subjects. *Int J Obes (Lond)* 31:424–428
  257. Rasmussen-Torvik LJ, Pankow JS, Jacobs Jr DR, Steinberger J, Moran A, Sinaiko AR 2009 The association of SNPs in ADIPOQ, ADIPOR1, and ADIPOR2 with insulin sensitivity in a cohort of adolescents and their parents. *Hum Genet* 125:21–28
  258. Dahlman I, Eriksson P, Kaaman M, Jiao H, Lindgren CM, Kere J, Arner P 2004  $\alpha 2$ -Heremans-Schmid glycoprotein gene polymorphisms are associated with adipocyte insulin action. *Diabetologia* 47:1974–1979
  259. Baier LJ, Permana PA, Yang X, Pratley RE, Hanson RL, Shen GQ, Mott D, Knowler WC, Cox NJ, Horikawa Y, Oda N, Bell GI, Bogardus C 2000 A calpain-10 gene polymorphism is associated with reduced muscle mRNA levels and insulin resistance. *J Clin Invest* 106:R69–R73
  260. Elbein SC, Chu W, Ren Q, Hemphill C, Schay J, Cox NJ, Hanis CL, Hasstedt SJ 2002 Role of calpain-10 gene variants in familial type 2 diabetes in Caucasians. *J Clin Endocrinol Metab* 87:650–654
  261. Orho-Melander M, Klannemark M, Svensson MK, Ridderstråle M, Lindgren CM, Groop L 2002 Variants in the calpain-10 gene predispose to insulin resistance and elevated free fatty acid levels. *Diabetes* 51:2658–2664
  262. Tripathy D, Eriksson KF, Orho-Melander M, Fredriksson J, Ahlqvist G, Groop L 2004 Parallel manifestation of insulin resistance and  $\beta$  cell decompensation is compatible with a common defect in type 2 diabetes. *Diabetologia* 47:782–793
  263. Goodarzi MO, Taylor KD, Guo X, Quiñones MJ, Cui J, Li Y, Saad MF, Yang H, Hsueh WA, Hodis HN, Rotter JI 2005 Association of the diabetes gene calpain-10 with sub-clinical atherosclerosis: the Mexican-American Coronary Artery Disease Study. *Diabetes* 54:1228–1232
  264. Sáez ME, González-Sánchez JL, Ramírez-Lorca R, Martínez-Larrad MT, Zabena C, González A, Morón FJ, Ruiz A, Serrano-Ríos M 2008 The CAPN10 gene is associated with insulin resistance phenotypes in the Spanish population. *PLoS ONE* 3:e2953
  265. Pizzuti A, Frittitta L, Argiolas A, Baratta R, Goldfine ID, Bozzali M, Ercolino T, Scarlato G, Iacoviello L, Vigneri R, Tassi V, Trischitta V 1999 A polymorphism (K121Q) of the human glycoprotein PC-1 gene coding region is strongly associated with insulin resistance. *Diabetes* 48:1881–1884
  266. Frittitta L, Baratta R, Spampinato D, Di Paola R, Pizzuti A, Vigneri R, Trischitta V 2001 The Q121 PC-1 variant and obesity have additive and independent effects in causing insulin resistance. *J Clin Endocrinol Metab* 86:5888–5891
  267. Kubaszek A, Pihlajamäki J, Karhapää P, Vauhkonen I, Laakso M 2003 The K121Q polymorphism of the PC-1 gene is associated with insulin resistance but not with dyslipidemia. *Diabetes Care* 26:464–467
  268. Abate N, Carulli L, Cabo-Chan Jr A, Chandalia M, Snell PG, Grundy SM 2003 Genetic polymorphism PC-1 K121Q and ethnic susceptibility to insulin resistance. *J Clin Endocrinol Metab* 88:5927–5934
  269. Böttcher Y, Körner A, Reinehr T, Enigk B, Kiess W, Stumvoll M, Kovacs P 2006 ENPP1 variants and haplotypes predispose to early onset obesity and impaired glucose and insulin metabolism in German obese children. *J Clin Endocrinol Metab* 91:4948–4952
  270. Perticone F, Maio R, Di Paola R, Sciacqua A, Marucci A, De Cosmo S, Perticone M, Sesti G, Trischitta V 2007 Role of PC-1 and ACE genes on insulin resistance and cardiac mass in never-treated hypertensive patients. Suggestive evidence for a digenic additive modulation. *Nutr Metab Cardiovasc Dis* 17:181–187
  271. Stoleran ES, Manning AK, McAteer JB, Dupuis J, Fox CS, Cupples LA, Meigs JB, Florez JC 2008 Haplotype structure of the ENPP1 gene and nominal association of the K121Q missense single nucleotide polymorphism with glycemic traits in the Framingham Heart Study. *Diabetes* 57:1971–1977
  272. Deeb SS, Fajas L, Nemoto M, Pihlajamäki J, Mykkänen L, Kuusisto J, Laakso M, Fujimoto W, Auwerx J 1998 A Pro12Ala substitution in PPAR $\gamma 2$  associated with decreased receptor activity, lower body mass index and improved insulin sensitivity. *Nat Genet* 20:284–287
  273. Koch M, Rett K, Maerker E, Volk A, Haist K, Deninger M, Renn W, Häring HU 1999 The PPAR $\gamma 2$  amino acid polymorphism Pro 12 Ala is prevalent in offspring of type II diabetic patients and is associated to increased insulin sensitivity in a subgroup of obese subjects. *Diabetologia* 42:758–762
  274. Jacob S, Stumvoll M, Becker R, Koch M, Nielsen M, Löblein K, Maerker E, Volk A, Renn W, Balletshofer B,



- Machicao F, Rett K, Häring HU 2000 The PPAR $\gamma$ 2 polymorphism pro12Ala is associated with better insulin sensitivity in the offspring of type 2 diabetic patients. *Horm Metab Res* 32:413–416
275. Stumvoll M, Wahl HG, Löblein K, Becker R, Machicao F, Jacob S, Häring H 2001 Pro12Ala polymorphism in the peroxisome proliferator-activated receptor- $\gamma$ 2 gene is associated with increased antilipolytic insulin sensitivity. *Diabetes* 50:876–881
276. Ek J, Andersen G, Urhammer SA, Hansen L, Carstensen B, Borch-Johnsen K, Drivsholm T, Berglund L, Hansen T, Lithell H, Pedersen O 2001 Studies of the Pro12Ala polymorphism of the peroxisome proliferator-activated receptor- $\gamma$ 2 (PPAR- $\gamma$ 2) gene in relation to insulin sensitivity among glucose tolerant Caucasians. *Diabetologia* 44:1170–1176
277. Chuang LM, Hsiung CA, Chen YD, Ho LT, Sheu WH, Pei D, Nakatsuka CH, Cox D, Pratt RE, Lei HH, Tai TY 2001 Sibling-based association study of the PPAR $\gamma$ 2 Pro12Ala polymorphism and metabolic variables in Chinese and Japanese hypertension families: a SAPHIRE study. *Stanford Asian-Pacific Program in Hypertension and Insulin Resistance. J Mol Med* 79:656–664
278. González Sánchez JL, Serrano Ríos M, Fernández Perez C, Laakso M, Martínez Larrad MT 2002 Effect of the Pro12Ala polymorphism of the peroxisome proliferator-activated receptor  $\gamma$ -2 gene on adiposity, insulin sensitivity and lipid profile in the Spanish population. *Eur J Endocrinol* 147:495–501
279. Poulsen P, Andersen G, Fenger M, Hansen T, Echwald SM, Vølund A, Beck-Nielsen H, Pedersen O, Vaag A 2003 Impact of two common polymorphisms in the PPAR $\gamma$  gene on glucose tolerance and plasma insulin profiles in monozygotic and dizygotic twins: thrifty genotype, thrifty phenotype, or both? *Diabetes* 52:194–198
280. Li S, Chen W, Srinivasan SR, Boerwinkle E, Berenson GS 2003 The peroxisome proliferator-activated receptor- $\gamma$ 2 gene polymorphism (Pro12Ala) beneficially influences insulin resistance and its tracking from childhood to adulthood: the Bogalusa Heart Study. *Diabetes* 52:1265–1269
281. Buzzetti R, Petrone A, Ribaud MC, Alemanno I, Zavarella S, Mein CA, Maiani F, Tiberti C, Baroni MG, Vecci E, Arca M, Leonetti F, Di Mario U 2004 The common PPAR- $\gamma$ 2 Pro12Ala variant is associated with greater insulin sensitivity. *Eur J Hum Genet* 12:1050–1054
282. Tavares V, Hirata RD, Rodrigues AC, Monte O, Salles JE, Scalissi N, Speranza AC, Hirata MH 2005 Association between Pro12Ala polymorphism of the PPAR- $\gamma$ 2 gene and insulin sensitivity in Brazilian patients with type-2 diabetes mellitus. *Diabetes Obes Metab* 7:605–611
283. Tönjes A, Scholz M, Loeffler M, Stumvoll M 2006 Association of Pro12Ala polymorphism in peroxisome proliferator-activated receptor  $\gamma$  with Pre-diabetic phenotypes: meta-analysis of 57 studies on nondiabetic individuals. *Diabetes Care* 29:2489–2497
284. Fanelli M, Filippi E, Sentinelli F, Romeo S, Fallarino M, Buzzetti R, Leonetti F, Baroni MG 2005 The Gly482Ser missense mutation of the peroxisome proliferator-activated receptor  $\gamma$  coactivator-1  $\alpha$  (PGC-1  $\alpha$ ) gene associates with reduced insulin sensitivity in normal and glucose-intolerant obese subjects. *Dis Markers* 21:175–180
285. Stefan N, Thamer C, Staiger H, Machicao F, Machann J, Schick F, Venter C, Niess A, Laakso M, Fritsche A, Häring HU 2007 Genetic variations in PPAR $\delta$  and PPAR $\gamma$ C1A determine mitochondrial function and change in aerobic physical fitness and insulin sensitivity during lifestyle. *J Clin Endocrinol Metab* 92:1827–1833
286. Reinehr T, Friedel S, Mueller TD, Toschke AM, Hebebrand J, Hinney A 2008 Evidence for an influence of TCF7L2 polymorphism rs7903146 on insulin resistance and sensitivity indices in overweight children and adolescents during a lifestyle intervention. *Int J Obes (Lond)* 32:1521–1524
287. Musso G, Gambino R, Pacini G, Pagano G, Durazzo M, Cassader M 2009 Transcription factor 7-like 2 polymorphism modulates glucose and lipid homeostasis, adipokine profile, and hepatocyte apoptosis in NASH. *Hepatology* 49:426–435
288. Fajas L, Auboeuf D, Raspé E, Schoonjans K, Lefebvre AM, Saladin R, Najib J, Laville M, Fruchart JC, Deeb S, Vidal-Puig A, Flier J, Briggs MR, Staels B, Vidal H, Auwerx J 1997 The organization, promoter analysis, and expression of the human PPAR $\gamma$  gene. *J Biol Chem* 272:18779–18789
289. Tontonoz P, Spiegelman BM 2008 Fat and beyond: the diverse biology of PPAR $\gamma$ . *Annu Rev Biochem* 77:289–312
290. Spiegelman BM 1998 PPAR- $\gamma$ : adipogenic regulator and thiazolidinedione receptor. *Diabetes* 47:507–514
291. Stumvoll M, Häring HU 2002 Glitazones: clinical effects and molecular mechanisms. *Ann Med* 34:217–224
292. Wolf G 2008 Role of fatty acids in the development of insulin resistance and type 2 diabetes mellitus. *Nutr Rev* 66:597–600
293. Stefan N, Kantartzis K, Häring HU 2008 Causes and metabolic consequences of fatty liver. *Endocr Rev* 29:939–960
294. Maddux BA, Sbraccia P, Kumakura S, Sasson S, Youngren J, Fisher A, Spencer S, Grupe A, Henzel W, Stewart TA 1995 Membrane glycoprotein PC-1 and insulin resistance in non-insulin-dependent diabetes mellitus. *Nature* 373:448–451
295. Belfiore A, Costantino A, Frasca F, Pandini G, Mineo R, Vigneri P, Maddux B, Goldfine ID, Vigneri R 1996 Overexpression of membrane glycoprotein PC-1 in MDA-MB231 breast cancer cells is associated with inhibition of insulin receptor tyrosine kinase activity. *Mol Endocrinol* 10:1318–1326
296. Grupe A, Alleman J, Goldfine ID, Sadick M, Stewart TA 1995 Inhibition of insulin receptor phosphorylation by PC-1 is not mediated by the hydrolysis of adenosine triphosphate or the generation of adenosine. *J Biol Chem* 270:22085–22088
297. Maddux BA, Goldfine ID 2000 Membrane glycoprotein PC-1 inhibition of insulin receptor function occurs via direct interaction with the receptor  $\alpha$ -subunit. *Diabetes* 49:13–19
298. Dong H, Maddux BA, Altomonte J, Meseck M, Accili D, Terkeltaub R, Johnson K, Youngren JF, Goldfine ID 2005 Increased hepatic levels of the insulin receptor inhibitor, PC-1/NPP1, induce insulin resistance and glucose intolerance. *Diabetes* 54:367–372
299. Maddux BA, Chang YN, Accili D, McGuinness OP, Youngren JF, Goldfine ID 2006 Overexpression of the insulin receptor inhibitor PC-1/ENPP1 induces insulin resistance and hyperglycemia. *Am J Physiol Endocrinol Metab* 290:E746–E749
300. Frittitta L, Youngren J, Vigneri R, Maddux BA, Trischitta

- V, Goldfine ID 1996 PC-1 content in skeletal muscle of non-obese, non-diabetic subjects: relationship to insulin receptor tyrosine kinase and whole body insulin sensitivity. *Diabetologia* 39:1190–1195
301. Frittitta L, Youngren JF, Sbraccia P, D'Adamo M, Buongiorno A, Vigneri R, Goldfine ID, Trischitta V 1997 Increased adipose tissue PC-1 protein content, but not tumour necrosis factor- $\alpha$  gene expression, is associated with a reduction of both whole body insulin sensitivity and insulin receptor tyrosine-kinase activity. *Diabetologia* 40:282–289
302. Costanzo BV, Trischitta V, Di Paola R, Spampinato D, Pizzuti A, Vigneri R, Frittitta L 2001 The Q allele variant (GLN121) of membrane glycoprotein PC-1 interacts with the insulin receptor and inhibits insulin signaling more effectively than the common K allele variant (LYS121). *Diabetes* 50:831–836
303. Yang X, Pratley RE, Baier LJ, Horikawa Y, Bell GI, Bogardus C, Permana PA 2001 Reduced skeletal muscle calpain-10 transcript level is due to a cumulative decrease in major isoforms. *Mol Genet Metab* 73:111–113
304. Logie LJ, Brown AE, Yeaman SJ, Walker M 2005 Calpain inhibition and insulin action in cultured human muscle cells. *Mol Genet Metab* 85:54–60
305. Brown AE, Yeaman SJ, Walker M 2007 Targeted suppression of calpain-10 expression impairs insulin-stimulated glucose uptake in cultured primary human skeletal muscle cells. *Mol Genet Metab* 91:318–324
306. Paul DS, Harmon AW, Winston CP, Patel YM 2003 Calpain facilitates GLUT4 vesicle translocation during insulin-stimulated glucose uptake in adipocytes. *Biochem J* 376:625–632
307. Turner MD 2007 Coordinated control of both insulin secretion and insulin action through calpain-10-mediated regulation of exocytosis? *Mol Genet Metab* 91:305–307
308. Guerre-Millo M 2008 Adiponectin: an update. *Diabetes Metab* 34:12–18
309. Arita Y, Kihara S, Ouchi N, Takahashi M, Maeda K, Miyagawa J, Hotta K, Shimomura I, Nakamura T, Miyaoka K, Kuriyama H, Nishida M, Yamashita S, Okubo K, Matsubara K, Muraguchi M, Ohmoto Y, Funahashi T, Matsuzawa Y 1999 Paradoxical decrease of an adipose-specific protein, adiponectin, in obesity. *Biochem Biophys Res Commun* 257:79–83
310. Hotta K, Funahashi T, Arita Y, Takahashi M, Matsuda M, Okamoto Y, Iwahashi H, Kuriyama H, Ouchi N, Maeda K, Nishida M, Kihara S, Sakai N, Nakajima T, Hasegawa K, Muraguchi M, Ohmoto Y, Nakamura T, Yamashita S, Hanafusa T, Matsuzawa Y 2000 Plasma concentrations of a novel, adipose-specific protein, adiponectin, in type 2 diabetic patients. *Arterioscler Thromb Vasc Biol* 20:1595–1599
311. Weyer C, Funahashi T, Tanaka S, Hotta K, Matsuzawa Y, Pratley RE, Tataranni PA 2001 Hypoadiponectinemia in obesity and type 2 diabetes: close association with insulin resistance and hyperinsulinemia. *J Clin Endocrinol Metab* 86:1930–1935
312. Staiger H, Tschritter O, Machann J, Thamer C, Fritsche A, Maerker E, Schick F, Häring HU, Stumvoll M 2003 Relationship of serum adiponectin and leptin concentrations with body fat distribution in humans. *Obes Res* 11:368–372
313. Cnop M, Havel PJ, Utzschneider KM, Carr DB, Sinha MK, Boyko EJ, Retzlaff BM, Knopp RH, Brunzell JD, Kahn SE 2003 Relationship of adiponectin to body fat distribution, insulin sensitivity and plasma lipoproteins: evidence for independent roles of age and sex. *Diabetologia* 46:459–469
314. Yamauchi T, Kamon J, Waki H, Terauchi Y, Kubota N, Hara K, Mori Y, Ide T, Murakami K, Tsuboyama-Kasaoka N, Ezaki O, Akanuma Y, Gavrilova O, Vinson C, Reitman ML, Kagechika H, Shudo K, Yoda M, Nakano Y, Tobe K, Nagai R, Kimura S, Tomita M, Froguel P, Kadowaki T 2001 The fat-derived hormone adiponectin reverses insulin resistance associated with both lipoatrophy and obesity. *Nat Med* 7:941–946
315. Fruebis J, Tsao TS, Javorschi S, Ebbets-Reed D, Erickson MR, Yen FT, Bihain BE, Lodish HF 2001 Proteolytic cleavage product of 30-kDa adipocyte complement-related protein increases fatty acid oxidation in muscle and causes weight loss in mice. *Proc Natl Acad Sci USA* 98:2005–2010
316. Tomas E, Tsao TS, Saha AK, Murrey HE, Zhang Cc C, Itani SI, Lodish HF, Ruderman NB 2002 Enhanced muscle fat oxidation and glucose transport by ACRP30 globular domain: acetyl-CoA carboxylase inhibition and AMP-activated protein kinase activation. *Proc Natl Acad Sci USA* 99:16309–16313
317. Yamauchi T, Kamon J, Minokoshi Y, Ito Y, Waki H, Uchida S, Yamashita S, Noda M, Kita S, Ueki K, Eto K, Akanuma Y, Froguel P, Foufelle F, Ferre P, Carling D, Kimura S, Nagai R, Kahn BB, Kadowaki T 2002 Adiponectin stimulates glucose utilization and fatty-acid oxidation by activating AMP-activated protein kinase. *Nat Med* 8:1–8
318. Menzaghi C, Ercolino T, Salvemini L, Coco A, Kim SH, Fini G, Doria A, Trischitta V 2004 Multigenic control of serum adiponectin levels: evidence for a role of the APM1 gene and a locus on 14q13. *Physiol Genomics* 19:170–174
319. Qi L, Li T, Rimm E, Zhang C, Rifai N, Hunter D, Doria A, Hu FB 2005 The +276 polymorphism of the APM1 gene, plasma adiponectin concentration, and cardiovascular risk in diabetic men. *Diabetes* 54:1607–1610
320. González-Sánchez JL, Zabena CA, Martínez-Larrad MT, Fernández-Pérez C, Pérez-Barba M, Laakso M, Serrano-Ríos M 2005 An SNP in the adiponectin gene is associated with decreased serum adiponectin levels and risk for impaired glucose tolerance. *Obes Res* 13:807–812
321. Mousavinasab F, Tähtinen T, Jokelainen J, Koskela P, Vanhala M, Oikarinen J, Keinänen-Kiukaanniemi S, Laakso M 2006 Common polymorphisms (single-nucleotide polymorphisms SNP+45 and SNP+276) of the adiponectin gene regulate serum adiponectin concentrations and blood pressure in young Finnish men. *Mol Genet Metab* 87:147–151
322. Woo JG, Dolan LM, Deka R, Kaushal RD, Shen Y, Pal P, Daniels SR, Martin LJ 2006 Interactions between noncontiguous haplotypes in the adiponectin gene ACDC are associated with plasma adiponectin. *Diabetes* 55:523–529
323. Mootha VK, Lindgren CM, Eriksson KF, Subramanian A, Sihag S, Lehar J, Puigserver P, Carlsson E, Ridderstråle M, Laurila E, Houstis N, Daly MJ, Patterson N, Mesirov JP, Golub TR, Tamayo P, Spiegelman B, Lander ES, Hirschhorn JN, Altshuler D, Groop LC 2003 PGC-1 $\alpha$ -responsive genes

- involved in oxidative phosphorylation are coordinately downregulated in human diabetes. *Nat Genet* 34:267–273
324. Mootha VK, Handschin C, Arlow D, Xie X, St Pierre J, Sihag S, Yang W, Altshuler D, Puigserver P, Patterson N, Willy PJ, Schulman IG, Heyman RA, Lander ES, Spiegelman BM 2004 *Errα* and *Gabpa/b* specify PGC-1 $\alpha$ -dependent oxidative phosphorylation gene expression that is altered in diabetic muscle. *Proc Natl Acad Sci USA* 101:6570–6575
  325. Dressel U, Allen TL, Pippal JB, Rohde PR, Lau P, Muscat GE 2003 The peroxisome proliferator-activated receptor  $\beta/\delta$  agonist, GW501516, regulates the expression of genes involved in lipid catabolism and energy uncoupling in skeletal muscle cells. *Mol Endocrinol* 17:2477–2493
  326. Kim JA, Wei Y, Sowers JR 2008 Role of mitochondrial dysfunction in insulin resistance. *Circ Res* 102:401–414
  327. Højlund K, Mogensen M, Sahlin K, Beck-Nielsen H 2008 Mitochondrial dysfunction in type 2 diabetes and obesity. *Endocrinol Metab Clin North Am* 37:713–731, x
  328. Mussig K, Staiger H, Machicao F, Machann J, Hennige AM, Schick F, Claussen CD, Fritsche A, Häring HU, Stefan N 8 April 2009 AHSB gene variation is not associated with regional body fat distribution—a magnetic resonance study. *Exp Clin Endocrinol Diabetes* 10.1055/s-0028–1103299
  329. Stefan N, Hennige AM, Staiger H, Machann J, Schick F, Kröber SM, Machicao F, Fritsche A, Häring HU 2006  $\alpha 2$ -Heremans-Schmid glycoprotein/fetuin-A is associated with insulin resistance and fat accumulation in the liver in humans. *Diabetes Care* 29:853–857
  330. Mori K, Emoto M, Yokoyama H, Araki T, Teramura M, Koyama H, Shoji T, Inaba M, Nishizawa Y 2006 Association of serum fetuin-A with insulin resistance in type 2 diabetic and nondiabetic subjects. *Diabetes Care* 29:468
  331. Auberger P, Falquerho L, Contreres JO, Pages G, Le Cam G, Rossi B, Le Cam A 1989 Characterization of a natural inhibitor of the insulin receptor tyrosine kinase: cDNA cloning, purification, and anti-mitogenic activity. *Cell* 58:631–640
  332. Rauth G, Pöschke O, Fink E, Eulitz M, Tippmer S, Kellerer M, Häring HU, Nawratil P, Haasemann M, Jahnen-Dechent W 1992 The nucleotide and partial amino acid sequences of rat fetuin. Identity with the natural tyrosine kinase inhibitor of the rat insulin receptor. *Eur J Biochem* 204:523–529
  333. Srinivas PR, Wagner AS, Reddy LV, Deutsch DD, Leon MA, Goustin AS, Grunberger G 1993 Serum  $\alpha 2$ -HS-glycoprotein is an inhibitor of the human insulin receptor at the tyrosine kinase level. *Mol Endocrinol* 7:1445–1455
  334. Mathews ST, Srinivas PR, Leon MA, Grunberger G 1997 Bovine fetuin is an inhibitor of insulin receptor tyrosine kinase. *Life Sci* 61:1583–1592
  335. Mathews ST, Chellam N, Srinivas PR, Cintron VJ, Leon MA, Goustin AS, Grunberger G 2000  $\alpha 2$ -HSG, a specific inhibitor of insulin receptor autophosphorylation, interacts with the insulin receptor. *Mol Cell Endocrinol* 164:87–98
  336. Hennige AM, Staiger H, Wicke C, Machicao F, Fritsche A, Häring HU, Stefan N 2008 Fetuin-A induces cytokine expression and suppresses adiponectin production. *PLoS ONE* 3:e1765
  337. Shimomura I, Shimano H, Horton JD, Goldstein JL, Brown MS 1997 Differential expression of exons 1a and 1c in mRNAs for sterol regulatory element binding protein-1 in human and mouse organs and cultured cells. *J Clin Invest* 99:838–845
  338. Guillou H, Martin PG, Pineau T 2008 Transcriptional regulation of hepatic fatty acid metabolism. *Subcell Biochem* 49:3–47
  339. Streicher R, Kotzka J, Müller-Wieland D, Siemeister G, Munck M, Avci H, Krone W 1996 SREBP-1 mediates activation of the low density lipoprotein receptor promoter by insulin and insulin-like growth factor-I. *J Biol Chem* 271:7128–7133
  340. Kim JB, Sarraf P, Wright M, Yao KM, Mueller E, Solanes G, Lowell BB, Spiegelman BM 1998 Nutritional and insulin regulation of fatty acid synthetase and leptin gene expression through ADD1/SREBP1. *J Clin Invest* 101:1–9
  341. Fleischmann M, Iynedjian PB 2000 Regulation of sterol regulatory-element binding protein 1 gene expression in liver: role of insulin and protein kinase B/cAkt. *Biochem J* 349:13–17
  342. Ribaux PG, Iynedjian PB 2003 Analysis of the role of protein kinase B (cAKT) in insulin-dependent induction of glucokinase and sterol regulatory element-binding protein 1 (SREBP1) mRNAs in hepatocytes. *Biochem J* 376:697–705
  343. Valera Mora ME, Scarfone A, Calvani M, Greco AV, Mingrone G 2003 Insulin clearance in obesity. *J Am Coll Nutr* 22:487–493
  344. Tschritter O, Fritsche A, Stefan N, Haap M, Thamer C, Bachmann O, Dahl D, Maerker E, Teigeler A, Machicao F, Häring H, Stumvoll M 2003 Increased insulin clearance in peroxisome proliferator-activated receptor  $\gamma 2$  Pro12Ala. *Metabolism* 52:778–783
  345. Kotronen A, Vehkavaara S, Seppälä-Lindroos A, Bergholm R, Yki-Järvinen H 2007 Effect of liver fat on insulin clearance. *Am J Physiol Endocrinol Metab* 293:E1709–E1715
  346. Havrankova J, Roth J, Brownstein M 1978 Insulin receptors are widely distributed in the central nervous system of the rat. *Nature* 272:827–829
  347. van Houten M, Posner BI, Kopriwa BM, Brawer JR 1979 Insulin-binding sites in the rat brain: *in vivo* localization to the circumventricular organs by quantitative radioautography. *Endocrinology* 105:666–673
  348. Plum L, Belgardt BF, Brüning JC 2006 Central insulin action in energy and glucose homeostasis. *J Clin Invest* 116:1761–1766
  349. van der Heide LP, Ramakers GM, Smidt MP 2006 Insulin signaling in the central nervous system: learning to survive. *Prog Neurobiol* 79:205–221
  350. Tschritter O, Preissl H, Hennige AM, Stumvoll M, Porubska K, Frost R, Marx H, Klösel B, Lutzenberger W, Birbaumer N, Häring HU, Fritsche A 2006 The cerebrocortical response to hyperinsulinemia is reduced in overweight humans: A magnetoencephalographic study. *Proc Natl Acad Sci USA* 103:12103–12108
  351. Tschritter O, Preissl H, Yokoyama Y, Machicao F, Häring HU, Fritsche A 2007 Variation in the FTO gene locus is associated with cerebrocortical insulin resistance in humans. *Diabetologia* 50:2602–2603
  352. Roden M, Bernroider E 2003 Hepatic glucose metabolism in humans—its role in health and disease. *Best Pract Res Clin Endocrinol Metab* 17:365–383



353. **Burcelin R, Knauf C, Cani PD** 2008 Pancreatic  $\alpha$ -cell dysfunction in diabetes. *Diabetes Metab* 34(Suppl 2):S49–S55
354. **Tschritter O, Stumvoll M, Machicao F, Holzwarth M, Weisser M, Maerker E, Teigeler A, Häring H, Fritsche A** 2002 The prevalent Glu23Lys polymorphism in the potassium inward rectifier 6.2 (KIR6.2) gene is associated with impaired glucagon suppression in response to hyperglycemia. *Diabetes* 51:2854–2860
355. **Suzuki M, Fujikura K, Inagaki N, Seino S, Takata K** 1997 Localization of the ATP-sensitive K<sup>+</sup> channel subunit Kir6.2 in mouse pancreas. *Diabetes* 46:1440–1444
356. **Bokvist K, Olsen HL, Høy M, Gotfredsen CF, Holmes WF, Buschard K, Rorsman P, Gromada J** 1999 Characterisation of sulphonylurea and ATP-regulated K<sup>+</sup> channels in rat pancreatic A-cells. *Pflugers Arch* 438:428–436
357. **MacDonald PE, De Marinis YZ, Ramracheya R, Salehi A, Ma X, Johnson PR, Cox R, Eliasson L, Rorsman P** 2007 A K ATP channel-dependent pathway within  $\alpha$  cells regulates glucagon release from both rodent and human islets of Langerhans. *PLoS Biol* 5:e143
358. **Scuteri A, Sanna S, Chen WM, Uda M, Albai G, Strait J, Najjar S, Nagaraja R, Orrù M, Usala G, Dei M, Lai S, Maschio A, Busonero F, Mulas A, Ehret GB, Fink AA, Weder AB, Cooper RS, Galan P, Chakravarti A, Schlessinger D, Cao A, Lakatta E, Abecasis GR** 2007 Genome-wide association scan shows genetic variants in the FTO gene are associated with obesity-related traits. *PLoS Genet* 3:e115
359. **Dina C, Meyre D, Gallina S, Durand E, Körner A, Jacobson P, Carlsson LM, Kiess W, Vatn V, Lecoer C, Delplanque J, Vaillant E, Pattou F, Ruiz J, Weill J, Levy-Marchal C, Horber F, Potoczna N, Herberg S, Le Stunff C, Bognères P, Kovacs P, Marre M, Balkau B, Cauchi S, Chèvre JC, Froguel P** 2007 Variation in FTO contributes to childhood obesity and severe adult obesity. *Nat Genet* 39:724–726
360. **Hinney A, Nguyen TT, Scherag A, Friedel S, Brönnner G, Müller TD, Grallert H, Illig T, Wichmann HE, Rief W, Schäfer H, Hebebrand J** 2007 Genome wide association (GWA) study for early onset extreme obesity supports the role of fat mass and obesity associated gene (FTO) variants. *PLoS ONE* 2:e1361
361. **Price RA, Li WD, Zhao H** 2008 FTO gene SNPs associated with extreme obesity in cases, controls and extremely discordant sister pairs. *BMC Med Genet* 9:4
362. **Hunt SC, Stone S, Xin Y, Scherer CA, Magness CL, Iadonato SP, Hopkins PN, Adams TD** 2008 Association of the FTO gene with BMI. *Obesity (Silver Spring)* 16:902–904
363. **Andreasen CH, Stender-Petersen KL, Mogensen MS, Torekov SS, Wegner L, Andersen G, Nielsen AL, Albrechtsen A, Borch-Johnsen K, Rasmussen SS, Clausen JO, Sandbaek A, Lauritzen T, Hansen L, Jørgensen T, Pedersen O, Hansen T** 2008 Low physical activity accentuates the effect of the FTO rs9939609 polymorphism on body fat accumulation. *Diabetes* 57:95–101
364. **Do R, Bailey SD, Desbiens K, Belisle A, Montpetit A, Bouchard C, Pérusse L, Vohl MC, Engert JC** 2008 Genetic variants of FTO influence adiposity, insulin sensitivity, leptin levels, and resting metabolic rate in the Quebec Family Study. *Diabetes* 57:1147–1150
365. **Grant SF, Li M, Bradfield JP, Kim CE, Annaiah K, Santa E, Glessner JT, Casalunovo T, Frackelton EC, Otieno FG, Shaner JL, Smith RM, Imielinski M, Eckert AW, Chiavacci RM, Berkowitz RI, Hakonarson H** 2008 Association analysis of the FTO gene with obesity in children of Caucasian and African ancestry reveals a common tagging SNP. *PLoS ONE* 3:e1746
366. **Hotta K, Nakata Y, Matsuo T, Kamohara S, Kotani K, Komatsu R, Itoh N, Mineo I, Wada J, Masuzaki H, Yoneda M, Nakajima A, Miyazaki S, Tokunaga K, Kawamoto M, Funahashi T, Hamaguchi K, Yamada K, Hanafusa T, Oikawa S, Yoshimatsu H, Nakao K, Sakata T, Matsuzawa Y, Tanaka K, Kamatani N, Nakamura Y** 2008 Variations in the FTO gene are associated with severe obesity in the Japanese. *J Hum Genet* 53:546–553
367. **Marville AF, Lange LA, Qin L, Adair LS, Mohlke KL** 2008 Association of FTO with obesity-related traits in the Cebu Longitudinal Health and Nutrition Survey (CLHNS) Cohort. *Diabetes* 57:1987–1991
368. **Peeters A, Beckers S, Verrijken A, Roevens P, Peeters P, Van Gaal L, Van Hul W** 2008 Variants in the FTO gene are associated with common obesity in the Belgian population. *Mol Genet Metab* 93:481–484
369. **Chang YC, Liu PH, Lee WJ, Chang TJ, Jiang YD, Li HY, Kuo SS, Lee KC, Chuang LM** 2008 Common variation in the fat mass and obesity-associated (FTO) gene confers risk of obesity and modulates BMI in the Chinese population. *Diabetes* 57:2245–2252
370. **Haupt A, Thamer C, Machann J, Kirchhoff K, Stefan N, Tschritter O, Machicao F, Schick F, Häring HU, Fritsche A** 2008 Impact of variation in the FTO gene on whole body fat distribution, ectopic fat, and weight loss. *Obesity (Silver Spring)* 16:1969–1972
371. **Villalobos-Comparán M, Teresa Flores-Dorantes M, Teresa Villarreal-Molina M, Rodríguez-Cruz M, García-Ulloa AC, Robles L, Huertas-Vázquez A, Saucedo-Villarreal N, López-Alarcón M, Sánchez-Muñoz F, Domínguez-López A, Gutiérrez-Aguilar R, Menjivar M, Coral-Vázquez R, Hernández-Stengele G, Vital-Reyes VS, Acuña-Alonzo V, Romero-Hidalgo S, Ruiz-Gómez DG, Riaño-Barros D, Herrera MF, Gómez-Pérez FJ, Froguel P, García-García E, Teresa Tusié-Luna M, Aguilar-Salinas CA, Canizales-Quinteros S** 2008 The FTO gene is associated with adulthood obesity in the Mexican population. *Obesity (Silver Spring)* 16:2296–2301
372. **Cornes BK, Lind PA, Medland SE, Montgomery GW, Nyholt DR, Martin NG** 2009 Replication of the association of common rs9939609 variant of FTO with increased BMI in an Australian adult twin population but no evidence for gene by environment (G x E) interaction. *Int J Obes (Lond)* 33:75–79
373. **Lappalainen TJ, Tolppanen AM, Kolehmainen M, Schwab U, Lindström J, Tuomilehto J, Pulkkinen L, Eriksson JG, Laakso M, Gylling H, Uusitupa M** 2009 The common variant in the FTO gene did not modify the effect of lifestyle changes on body weight: the Finnish Diabetes Prevention Study. *Obesity (Silver Spring)* 17:832–836
374. **Gerken T, Girard CA, Tung YC, Webby CJ, Saudek V, Hewitson KS, Yeo GS, McDonough MA, Cunliffe S, McNeill LA, Galvanovskis J, Rorsman P, Robins P, Prieur X, Coll AP, Ma M, Jovanovic Z, Farooqi IS, Sedgwick B, Barroso I, Lindahl T, Ponting CP, Ashcroft FM, O'Rahilly S, Schofield CJ** 2007 The obesity-associated FTO gene encodes a 2-oxoglutarate-dependent nucleic acid demethylase. *Science* 318:1469–1472
375. **Speakman JR, Rance KA, Johnstone AM** 2008 Polymor-

- phisms of the FTO gene are associated with variation in energy intake, but not energy expenditure. *Obesity* (Silver Spring) 16:1961–1965
376. Wardle J, Carnell S, Haworth CM, Farooqi IS, O’Rahilly S, Plomin R 2008 Obesity associated genetic variation in FTO is associated with diminished satiety. *J Clin Endocrinol Metab* 93:3640–3643
  377. Wardle J, Llewellyn C, Sanderson S, Plomin R 2009 The FTO gene and measured food intake in children. *Int J Obes (Lond)* 33:42–45
  378. Timpson NJ, Emmett PM, Frayling TM, Rogers I, Hattersley AT, McCarthy MI, Davey Smith G 2008 The fat mass- and obesity-associated locus and dietary intake in children. *Am J Clin Nutr* 88:971–978
  379. Haupt A, Thamer C, Staiger H, Tschrötter O, Kirchhoff K, Machicao F, Häring HU, Stefan N, Fritsche A 2009 Variation in the FTO gene influences food intake but not energy expenditure. *Exp Clin Endocrinol Diabetes* 117:194–197
  380. Loos RJ, Lindgren CM, Li S, Wheeler E, Zhao JH, Prokopenko I, Inouye M, Freathy RM, Attwood AP, Beckmann JS, Berndt SI, Jacobs KB, Chanock SJ, Hayes RB, Bergmann S, Bennett AJ, Bingham SA, Bochud M, Brown M, Cauchi S, Connell JM, Cooper C, Smith GD, Day I, Dina C, De S, Dermitzakis ET, Doney AS, Elliott KS, Elliott P, Evans DM, Sadaf Farooqi I, Froguel P, Ghorji J, Groves CJ, Gwilliam R, Hadley D, Hall AS, et al. 2008 Common variants near MC4R are associated with fat mass, weight and risk of obesity. *Nat Genet* 40:768–775
  381. Thorleifsson G, Walters GB, Gudbjartsson DF, Steinthorsdottir V, Sulem P, Helgadóttir A, Strykarsdóttir U, Gretarsdóttir S, Thorlacius S, Jonsdóttir I, Jonsdóttir T, Olafsdóttir EJ, Olafsdóttir GH, Jonsson T, Jonsson F, Borch-Johnsen K, Hansen T, Andersen G, Jorgensen T, Lauritzen T, Aben KK, Verbeek AL, Roeleveld N, Kampman E, Yanek LR, Becker LC, Tryggvadóttir L, Rafnar T, Becker DM, Gulcher J, Kiemenev LA, Pedersen O, Kong A, Thorsteinsdóttir U, Stefansson K 2009 Genome-wide association yields new sequence variants at seven loci that associate with measures of obesity. *Nat Genet* 41:18–24
  382. Willer CJ, Speliotes EK, Loos RJ, Li S, Lindgren CM, Heid IM, Berndt SI, Elliott AL, Jackson AU, Lamina C, Lettre G, Lim N, Lyon HN, McCarroll SA, Papadakis K, Qi L, Randall JC, Rocaesecca RM, Sanna S, Scheet P, Weedon MN, Wheeler E, Zhao JH, Jacobs LC, Prokopenko I, Soranzo N, Tanaka T, Timpson NJ, Almgren P, Bennett A, Bergman RN, Bingham SA, Bonnycastle LL, Brown M, Burt NP, Chines P, Coin L, Collins FS, et al. 2009 Six new loci associated with body mass index highlight a neuronal influence on body weight regulation. *Nat Genet* 41:25–34
  383. Meyre D, Delplanque J, Chèvre JC, Lecoœur C, Lobbens S, Gallina S, Durand E, Vatin V, Degraeve F, Proença C, Gaget S, Körner A, Kovacs P, Kiess W, Tichet J, Marre M, Hartikainen AL, Horber F, Potoczna N, Herberg S, Levy-Marchal C, Pattou F, Heude B, Tauber M, McCarthy MI, Blakemore AI, Montpetit A, Polychronakos C, Weill J, Coin LJ, Asher J, Elliott P, Järvelin MR, Visvikis-Siest S, Balkau B, Sladek R, Balding D, Walley A, Dina C, Froguel P 2009 Genome-wide association study for early-onset and morbid adult obesity identifies three new risk loci in European populations. *Nat Genet* 41:157–159
  384. Keshavarz P, Inoue H, Sakamoto Y, Kunika K, Tanahashi T, Nakamura N, Yoshikawa T, Yasui N, Shiota H, Itakura M 2006 No evidence for association of the ENPP1 (PC-1) K121Q variant with risk of type 2 diabetes in a Japanese population. *J Hum Genet* 51:559–566
  385. Chandalia M, Grundy SM, Adams-Huet B, Abate N 2007 Ethnic differences in the frequency of ENPP1/PC1 121Q genetic variant in the Dallas Heart Study cohort. *J Diabetes Complications* 21:143–148
  386. Lango H, Palmer CN, Morris AD, Zeggini E, Hattersley AT, McCarthy MI, Frayling TM, Weedon MN 2008 Assessing the combined impact of 18 common genetic variants of modest effect sizes on type 2 diabetes risk. *Diabetes* 57:3129–3135
  387. Kilpeläinen TO, Lakka TA, Laaksonen DE, Lindström J, Eriksson JG, Valle TT, Hämäläinen H, Ilanne-Parikka P, Keinänen-Kiukaanniemi S, Lindi V, Tuomilehto J, Uusitupa M, Laakso M 2008 SNPs in PPAR $\gamma$  associate with type 2 diabetes and interact with physical activity. *Med Sci Sports Exerc* 40:25–33
  388. Meigs JB, Shrader P, Sullivan LM, McAteer JB, Fox CS, Dupuis J, Manning AK, Florez JC, Wilson PW, D’Agostino Sr RB, Cupples LA 2008 Genotype score in addition to common risk factors for prediction of type 2 diabetes. *N Engl J Med* 359:2208–2219
  389. Sparso T, Grarup N, Andreasen C, Albrechtsen A, Holmkvist J, Andersen G, Jørgensen T, Borch-Johnsen K, Sandbaek A, Lauritzen T, Madsbad S, Hansen T, Pedersen O 2009 Combined analysis of 19 common validated type 2 diabetes susceptibility gene variants shows moderate discriminative value and no evidence of gene-gene interaction. *Diabetologia* 52:1308–1314
  390. Perry JR, Frayling TM 2008 New gene variants alter type 2 diabetes risk predominantly through reduced  $\beta$ -cell function. *Curr Opin Clin Nutr Metab Care* 11:371–377
  391. Lehtovirta M, Kaprio J, Forsblom C, Eriksson J, Tuomilehto J, Groop L 2000 Insulin sensitivity and insulin secretion in monozygotic and dizygotic twins. *Diabetologia* 43:285–293
  392. Watanabe RM, Valle T, Hauser ER, Ghosh S, Eriksson J, Kohtamäki K, Ehnholm C, Tuomilehto J, Collins FS, Bergman RN, Boehnke M 1999 Familiality of quantitative metabolic traits in Finnish families with non-insulin-dependent diabetes mellitus. *Hum Hered* 49:159–168
  393. Wareham NJ, Franks PW, Harding AH 2002 Establishing the role of gene-environment interactions in the etiology of type 2 diabetes. *Endocrinol Metab Clin North Am* 31:553–566
  394. Grarup N, Andersen G 2007 Gene-environment interactions in the pathogenesis of type 2 diabetes and metabolism. *Curr Opin Clin Nutr Metab Care* 10:420–426
  395. Ling C, Poulsen P, Simonsson S, Rönn T, Holmkvist J, Almgren P, Hagert P, Nilsson E, Mabey AG, Nilsson P, Vaag A, Groop L 2007 Genetic and epigenetic factors are associated with expression of respiratory chain component NDUFB6 in human skeletal muscle. *J Clin Invest* 117:3427–3435
  396. Rönn T, Poulsen P, Hansson O, Holmkvist J, Almgren P, Nilsson P, Tuomi T, Isomaa B, Groop L, Vaag A, Ling C 2008 Age influences DNA methylation and gene expression of COX7A1 in human skeletal muscle. *Diabetologia* 51:1159–1168
